# Supplementary material for: A molecular grammar for environmental sensitivity in intrinsically disordered protein regions
Source: bioRxiv preprint, doi:10.64898/2026.04.20.719774, version 1 (2026-04-22)
Supplement: SI Table 2 [file 719774_file05.xlsx]

## Sheet: Hoja 1
SI Table 2. Codon optimized open reading frames (ORFs) that code for naturally occurring IDRs. Each ORF was cloned in the FRET system
Entry	Cloned open reading frame
IDR-001	AGCAACAGACAATTGGAAAGATCCGGTAGATTCGGTGGTAACCCAGGTGGCTTTGGTAATCAAGGTGGTTTCGGTAACTCCCGTGGTGGTGGAGCCGGTTTAGGTAACAACCAAGGTTCTAACATGGGTGGTGGTATGAACTTCGGTGCCTTCTCCATCAACCCAGCTATGATGGCTGCTGCTCAAGCCGCTTTGCAATCCTCTTGGGGTATGATGGGTATGTTGGCTTCTCAACAAAACCAATCTGGTCCATCTGGTAACAACCAAAATCAAGGTAACATGCAAAGAGAACCAAACCAAGCTTTCGGTTCAGGTAACAATTCTTACTCTGGCAGTAACTCTGGTGCTGCCATTGGTTGGGGTTCTGCTTCCAACGCTGGTTCCGGTTCCGGTTTCAAC…
IDR-002	ATGGCCTCTAACGACTACACCCAACAAGCTACCCAATCTTATGGTGCTTACCCAACTCAACCAGGTCAAGGTTACTCTCAACAATCTTCTCAACCATACGGTCAACAATCTTACTCTGGTTACTCCCAATCTACCGATACTTCTGGTTACGGTCAATCCTCCTATTCCTCTTACGGTCAATCCCAAAATACCGGTTACGGTACTCAATCTACTCCACAAGGTTATGGTTCCACTGGTGGTTACGGTTCTTCTCAAAGTTCTCAATCCTCCTACGGTCAACAATCTTCTTACCCAGGTTACGGTCAACAACCAGCTCCATCTTCCACCTCTGGTTCTTACGGTTCGTCAAGCCAATCCTCTTCTTACGGACAACCTCAAAGTGGTTCTTACTCTCAACAA…
IDR-003	GGTAATCCAATCAAGGTTTCTTTCGCTACCAGAAGAGCCGATTTCAACAGAGGTGGTGGTAACGGTAGAGGTGGTAGAGGTAGAGGTGGTCCAATGGGTAGAGGTGGTTATGGTGGTGGTGGTTCCGGTGGTGGTGGTAGGGGTGGTTTCCCATCTGGTGGTGGTGGTGGAGGGGGTCAACAAAGAGCTGGTGACTGGAAATGCCCAAACCCAACTTGTGAAAACATGAACTTTTCATGGAGAAACGAATGTAACCAATGTAAGGCTCCAAAGCCAGACGGTCCTGGTGGTGGTCCAGGTGGTTCTCACATGGGTGGTAACTACGGTGATGACAGAAGAGGTGGCCGTGGTGGTTACGATCGTGGCGGTTACAGAGGTCGTGGTGGTGACAGAGGTGGT…
IDR-004	ATGTCCAGAGCTGCTTTGCCATCTTTGGAAAACCTAGAAGACGATGATGAATTCGAAGATTTTGCTACCGAAAACTGGCCAATGAAGGACACTGAATTGGACACCGGTGACGACACTTTGTGGGAAAACAACTGGGATGACGAAGACATCGGTGATGACGATTTCTCTGTCCAATTGCAAGCTGAATTAAAAAAGAAGGGTGTTGCCGCCAAT
IDR-005	CGTGATGAAATCTCTCTAGACAGTGCCAAGAAGGCTGCTTGTGAATTCTCTGAAACTGATGTCACTAATACTGAACACCACCAACCATCTAACAACGACTTGAACACCACCGAAAAGAGAGCTGCCGAAAGACATCCAGAAAAGTACCAAGGTTCTTCCGTTTCCAACTTGCACGTTGAACCATGTGGTACCAACACTCACGCTTCTTCTTTGCAACACGAAAACTCCTCATTATTGTTGACCAAGGACAGAATGAACGTCGAAAAAGCTGAATTCTGTAACAAGTCCAAGCAACCAGGT
IDR-006	CACAACTCCAAGGCTCCAAAGAAGAACAGATTGAGAAGAAAGTCCTCAACCAGACACATTCACGCTTTGGAATTGGTTGTCTCCAGAAACTTGTCTCCACCTAACTGTACTGAATTGCAAATCGATTCTTGTTCCTCTTCTGAAGAAATCAAGAAGAAAAAGTACAACCAAATGCCAGTTCGTCACTCTAGAAATCTACAATTGATGGAAGGTAAGGAACCAGCTACCGGTGCCAAGAAATCCAACAAGCCAAACGAACAAACTTCTAAGAGACATGACTCTGACACTTTCCCAGAATTA
IDR-007	ATGGAAGAACCACAATCTGATCCATCCGTCGAACCACCTCTATCCCAAGAAACTTTCTCTGACTTGTGGAAGTTGTTGCCAGAAAACAACGTCTTGTCCCCATTGCCATCTCAAGCTATGGACGATTTGATGTTGTCTCCAGATGACATCGAACAATGGTTCACTGAAGACCCAGGTCCAGACGAAGCCCCAAGAATGCCAGAAGCTGCCCCACCAGTTGCTCCAGCTCCTGCTGCTCCAACCCCAGCCGCTCCAGCTCCAGCTCCTTCTTGGCCATTAAGTTCATCCGTTCCATCTCAAAAGACC
IDR-008	AAAAAGCCATTGGATGGTGAATACTTCACTTTGCAAATCAGAGGTAGAGAAAGATTCGAAATGTTTCGTGAATTGAACGAAGCTTTGGAATTAAAGGATGCCCAAGCTGGTAAGGAACCAGGTGGTTCCAGAGCCCACTCTTCTCATCTAAAATCCAAGAAGGGTCAATCCACCTCTAGACACAAGAAGTTGATGTTCAAGACTGAAGGTCCAGACTCTGAC
IDR-009	AACACTGCAGGTACCAGTTTGCCATCTGTTGACTTGTTGCAAAAGTTGAGATTGACCCCACAACACGACCAAATCCAAACTCAACCATTGGGTAAGGGTGCTATGGTTGCCTCTTTCAGCCCAGCTGCCGGTCAATTGGCTACTCCAGAATCCTTCATTGAACCACCTTCTAAGACCGCCGCTGCTCGTGTCGCTGCTTCTGCTTCCTTATCTAACATGGTCTTAGCTCCACTACAATCCATGCAACAAAACCAAGACCCAGAAGTTTTCGTCCAACCAAAGGTTTTGTCTTCCGCTATTCCAGTTGCTGGTGCTCCATTAGTGACTGCTACCACCACTGCTGTCTCCTCCGTTCTATTGGCCCCTTCAGTCTTCCAACAAACCGTTACCAGATCCTCT…
IDR-010	ATGGGAGATGAAGACTGGGAAGCTGAAATCAACCCTCACATGTCTTCTTACGTTCCAATTTTTGAAAAGGACAGATATTCTGGTGAAAACGGTGACAACTTCAACAGAACTCCAGCTTCTTCCTCCGAAATGGATGATGGTCCATCTAGACGTGACCACTTCATGAAATCTGGTTTTGCCTCCGGTAGAAACTTTGGTAACAGAGATGCTGGTGAATGCAACAAGAGAGACAACACTAGCACCATGGGTGGTTTCGGTGTTGGTAAGTCTTTCGGTAACAGAGGTTTCTCCAACTCCAGATTCGAAGATGGTGATAGTTCAGGTTTCTGGAGAGAATCTTCTAACGACTGTGAAGATAACCCAACCAGAAACCGTGGTTTCTCCAAGAGAGGTGGTTAC…
IDR-011	GGTGTTGACCCAGCTTTGTCCGATCCAGTTTTGGCCAGAAGATTGAGAGAAAACAGATCCTTGGCTATGTCCCGTTTAGATGAAGTCATCTCCAAGTACGCCATGTTGCAAGATAAATCTGAAGAAGGTGAAAGAAAGAAGAGAAGAGCTAGACTACAAGGTACCTCTTCTCACTCTGCTGACACTCCAGAAGCTTCTTTGGACTCTGGTGAAGGTCCATCA
IDR-012	GGTCCAACTCAAGCTGCTCCAGGTGTCCGTGTTGAAGAAGAAGAATGGGCTAGAGAAATCGGTGCTCAATTGAGAAGAATGGCCGATGACTTGAACGCCCAATACGAAAGACGTAGACAAGAAGAACAACACAGACACAGACCATCTCCATGGAGAGTTATG
IDR-013	ATGAAGCACCCATACGAAGAATTCCCAACCGGTAGCAAATCTCCTTACAACATGTCCAGAGGTGCCCATCCAGGTGCTGTCTTGTTGTCCCCTCAATCCTCTGCCATTAACAAGAACAACCCAGGCTCTAACTCCGGTAACAACCAAGGTAACTCTTCTGTTACTGCTAACGTTTTGTCCCCACAATCCCACTCCATGTCTCTAAATGACATGTTGGACCAACAATCATTCATGTTAGACACTGCCGGTACCAGAGCCCAACCATTGCAACAACAACAACAACAACAACAACAACAACAACAAGCTTCTTTGCCATCTTTAAACATCCAAACTGTCTCGTCCACCGCTGCTGGTTCTGCTATTGTTTCTCCAATGATGCAAAGTCCAAAGGCTTTGCAG…
IDR-014	GATGGTGCTGGTGAAGGTCCAGCTCAATCTTTGACTGAACAAATGAAGAAGATCGCCTTGGAATCCGTCGGTCAACCAGAAGAATTGATGGAATCTGACAACTGTTCTGGTGGTGACGATGACTGGACCCACTTATCATCCAAAGAAGTTGACCCTAGTACTGGTGAATTACAATCCCTACAAATGCCAGAATCTGAAGGTCCATCCTCTTTGGACCCATCTCAAGAAGGCCCAACCGGTTTGAAGGAAGCTGCTTTGTACCCACACTTGCCACCAGAAGCCGATCCAAGATTGATTGAA
IDR-015	AAAGTTCCAGCTCAAGAATCTCAAGATGTCTCTGGTTCCAGACCAGCTGCTCCATTGATTGGTGCTCCAGCCAATTCTGAAGACACTCACTTAGTCGACCCAAAGACCGACCCATCTGACTCCCAAACCGGTTTGGCTGAACAATGTGCTGGTATCAGAAAGCGTCCTGCCACCGATGACTCATCCACTCAAAACAAGAGAGCTAACAGAACTGAAGAAAACGTTTCCGATGGTTCTCCAAAC
IDR-016	CCACCAGAAACCTGGTTGCAAAACGAAAGAGAATTAAAGCGTGAAAGACGTAAGCAATCCAACAGAGAATCTGCCAGAAGATCCAGATTGAGAAAGCAAGCTGAAACTGAAGAATTGGCTAGAAAGGTTGAAGCTTTGACTGCTGAAAACATGGCTCTAAGATCCGAATTGAACCAATTGAATGAAAAGTCAGATAAATTAAGAGGTGCCAACGCCACCTTGTTGGACAAGTTGAAGTGTTCCGAACCAGAAAAGAGAGTTCCAGCTAACATGTTGTCTCGTGTCAAGAACTCTGGTGCTGGTGACAAAAACAAGAACCAA
IDR-017	AGAACTTACATGGACGTTATGAGAGAACAACACTTAACCAAGGAAGAACGTGAAATCAGACAACAATTGGCTGAAAAGGCCAAAGCCGGTGAATTGAAGGTTGTCAACGGTGCCGCTGCTTCTCAACCACCATCCAAAAGAAAGAGAAGATGGGATCAAACTGCTGACCAAACCCCAGGTGCTACTCCAAAGAAGTTGTCCTCATGGGACCAAGCTGAAACCCCAGGTCACACTCCATCTTTGCGTTGGGATGAAACCCCAGGTAGAGCTAAGGGTTCTGAAACTCCAGGTGCTACCCCT
IDR-018	ATGCCATTGCCAGTTGCTTTGCAAACTCGTCTAGCCAAGAGAGGTATCTTGAAGCACTTAGAACCAGAACCAGAAGAAGAAATCATTGCTGAAGACTACGATGATGACCCAGTCGACTACGAAGCTACCAGATTGGAAGGTTTGCCACCT
IDR-019	CCAAACTCTGTTGTTACCAAGTCTGCCAAGAAGTTGAGATCCTCCAATGCCGACGCTGAAGAAAAACTAGATCGTTCACATGATAAGAGTGACAGAGGCCATGACAAATCTGACAGATCCCACGAAAAGTTGGACCGTGGTCACGACAAGTCTGACAGAGGTCACGATAAATCCGATAGAGACAGAGAAAGAGGTTACGATAAGGTTGACAGAGAAAGAGAAAGAGATCGTGAGCGTGATAGAGACAGAGGTTACGACAAGGCCGATCGTGAAGAAGGTAAGGAAAGAAGACACCACAGAAGAGAAGAATTGGCTCCTTATCCAAAGTCCAAGAAGGCTGTCTCCAGAAAGGACGAAGAATTAGATCCAATGGACCCATCCTCTTACTCTGATGCTCCA…
IDR-020	ATGTCTGACGAAGCTAAGGAAAAGAGAGAATTGGAATCTCAAAAGGAATCTTCTCACAACAAGTCCGAAAAATCCGTCGAACCAAAGCCAAAGCGTCGTAGAAGAAGAAACTACGATGACTATGACGCCGAAGTTGCTAAAGAGGAAACCAAGGCTAAGAACGGTTTGACCAAATCAGAAAACAATGGTACTGTTGAAGACTCTGAATCCGACATGGACGATGCCAAGTTGGACGCTTTGATGGGTAACGAAGGTGAAGAAGAAGAAGATGACTTGGCTGAAATTGACACTTCCAACATCATCACTTCTGGTAGAAGAACCAGAGGTAAGGTCATTGATTACAAGAAGACTGCTGAAGAATTAGACAAGAAGGAACCATCTACCGGTTCCAAGGACGAT…
IDR-021	ATGAACATTGTCCCACAAGATACTTTCAAGTCTCAAGTTTCCACTGACCAAGATAAATCCGTCTTGTCTTCTGCCGTTCCATCTTTGCCAGACACTTTGAGACAACAAGAAGGTGGTGCTGTCCCTTTATCAACCCAATTAAATGACAGACACCCATTGGAATCTACTCTAAAGAACTGGGAAACCACACAACGTCAAAGACAAATGGAACAATACAGACAAATCTTTGGTATTGCTGAACCAATGAAGAGAACTATGGAAATGGAAATCGTTAACAGAACCGATTTCAACCCATTGTCCACCAACGGTTCTATTCACAGAGACATCTTGTTGAACAAGGAATGTTCCATTGACTGGGAAGATGTCTACCCAGGTACTGGTTTGCAAGCTTCTACCATG…
IDR-022	TTAAACATGGAAGATTTGATGGAAGGTAACCACCATTTGTTGTCTGACTCTTCTGAAGCTGGTTCTTCCAGTGAAGGTGAACACATTTCATCCATTCCAACCAGAGGTGAAATTGCCAAGTTGAAGGCTCAAAAGTCTTTGTCCAGAAGAAAGATTTCTGAATCTGATGTTACCACTGAAAGAGACTACGTCAAGCTATTAGACTCCGAAGACAAGAGAGAAATCATGGAAACTATCAGATTGAACGGTGGTTTGAAACGTAATAACGAAAAGGAAATCACTAACTTCTCCGATGACGAA
IDR-023	ATGCAAGGTTTCCAAGATGAAATGTTGGCTTTGACTGACAACCAAATTGCTATCCAAAAGGATTCAAAACGTAAGATCATTGAAAAGGCCATTAATGAAGTTCCATACAGAACCAACGAAGAATGGGAAACTCAATTGTTGTCTAAGGGTAACATTAACAAATCTAACGAAAAAATCATCACTCCATTGCCAGTCTTATTCCCAGACGATGACGAATCTGGTAACTCCATCGAAAGAATCAACGAAATGGTTTCCAAGATTTGTTTGCAAAGAAAGAAGGTCGAAATGAGATTACAAGCTCTAGAAAAGACCAAGATTGACTTGGAAAAGTCCAAGGCTTCTTTGATCAACAAGTTGATTGGTAAC
IDR-024	ATGAAATTGCCAGTTGCTCAATACTCTGCTCCAGACGGTGTTGAAAAATCTTTCGCCCCTATCAGAGATGACCCAAGATACATGACTACTGAAGGTAGAACCACCGGTCCATCCGACCACGTCTTGAACGCCGGTCAAATTGACAGAGACAAGCCATCTGAACCAGAAAGAACCAAGGATGGTTCCCAATTAACTTACTTGGGTCAATTGAGAACTCAACTAACTGGTTTGCAAGATGACATTAATGAATTCTTGACCGGCCGTATGGAATTGGCTAAGAACAAGAAGAAGGCTGGTGCTGATGAAAAGAGAATCCAAGAAGAAATCAACCAATTATTGGACGGTGGTGATGGTGACGAAGATGCTGTC
IDR-025	AATGCTGGTACTGAAAAGGAAAAGGAATCCAAGAAGGACTCCAAACCTGCCTTCTCTTTCGGTATTAGTAACGGTTCTGAATCTAAGGATTCTGACAAACCATCTTTGCCATCCGCCGTTGACGGTGAAAACGACAAGAAAGAAGCTACCAAGCCAGCTTTCTCCTTCGGTATCAACACCAACACTACTAAGACTGCTGATACCAAGGCTCCAACTTTCACCTTTGGTTCCTCTGCTTTGGCTGACAACAAGGAAGATGTCAAGAAGCCATTCTCATTCGGTACCTCTCAACCAAACAAC
IDR-026	ATGTCTGAAAACATTGGTCACATTAACATCAACGCTAATTTGCAAAACGTTGACAGAAGAGATGCTGCCGCTATCCAATCTGTCGAAAGAAAGTTGTTGGGTTATAACCCACCTGGTGGTTTAGCTAGCGAAGCTCAATCAGCCGCAGCTTTGAATGAAGGTATTGGTCAACCAATGAACAGAGGTATCTCTACTGACATCCCAGCCCCAGCTGACATTGACGTCGATCGTGGTACTGCTTCTAAAGATTTCGGTCATGTCAGATTTGATGTCGACTTGAACCAAGTTAGACCAGAAGAAGCCGCCGCCCTACAAGCTGCTGAATCCAAGATTGAAGGTTTGGCTCCATCCATCACTGTTGGTGGTATCGGCTCCGCTGCTCAATCCATGGCTGCTTTC…
IDR-027	ATGTCTGAATCTGGTCAAGAACAAAACAGAGGTACTAACACTTCTCCAAACAACGCTGAAAACAACAATAATTCAAACGCCGCTAGCGGCCCATTGAATGGTGGTGCCGAACAAACCAGAAACATCACTGTCTCCATCCAATACTCTTACTTTACCCCAGAAAGATTAGCTCACTTGTCCAACATTTCCAACAACGACAACAACGAAAACAACTCTGCTGCCAGTGGTTCCACCATTGCCAACGGTACCGGTCCATCTTTCGGTATTGGTAACGGTGGTCACCAACCAGATGGTGCTTTGGTCTTGTCTTTCAGAGATGTTCCAGCTTCTACTCCACAAGACAGATTGAACTCCTTCATCTCTGTTGCTGCTCAATTGGCTATGGAAAGATTCAACCGT…
IDR-028	CAAAAGATTTCTGAATCTGTCGGTGTCCAAAGAGCTGCTCAACAAGACACTGATGAAGTTGCCGCCAACGAAGCTGCTTTCGAAAGAATCAGAAGAGTTTTGTACGACCCAACTGCTGTCAACTCCACCAACGAAAATTCCTCTGCTCCATCCGAAAACACTTCAAACACCACCGTCCCAACCATTGGTAACGCTAGTTCCGGTGAACAAATGTTGTCCCGTACTGGTTTCTTTTTAGTTCCACAAAATGGTCAACCATTGCACAACCCAGTTAGATTGCCACCAAACGATTCTGACAGAAACGGTGTTAACGGTCCATCTTCTACCACTCAAAACCCACCTTCCAACTCTGGTGGTTCTAACAACAACCAATCTCCAAGATGGGTTCCT
IDR-029	ATGTCCGTCTACTTCCCAATTCACTGCTCTGACTACTTACGTTCAGCTGAAATGACTGAAGTTATGATGAACGCCCCTTCCATGGAAGAAATTGGTCTATCTCCAAGAAAGGATGGTTTGTCTTACCAAATCTTCCCAGACCCATCTGATTTTGATAGATGTTGTAAGTTGAAAGACAGATTGCCATCCATCGTTGTTGAACCAACTGAAGGTGAAGTCGAATCTGGTGAATTGAGATGGCCACCAGAAGAATTCTTGGTCCAAGAAGATGAACAAGACAACTGTGAAGAGACCACCAACGAAAAGAAGGACCAA
IDR-030	ACCCCAGTCACCATTGAAAATTTTTTATCTTGGAAGGCTAAGTTCGATGCTGAATTGTTGGAAATCAAAAAAAAGAGAATGAAGGAAGAAGAACAAGCTGGTAAGAACAAGTTGTCCGGTAAGCAATTATTCGAAACTGACCACAACTTGGACACTTCTGATATCCAATTCTTGGAAGATGCCGGTAACAACGTTGAAGTCGATGAATCTTTGTTCCAAGAAATGGACGACTTGGAACTAGAAGACGGTGAAGATGACCCAGACTACAACCCAGTTGCTCCAGGTTCTGACTCCTCCGAT
IDR-031	TCCCACAGACCAATCAAGGGTATCTTGAAGAACAAGACCTCAGCTGCTTCTCCACCAGTTGTTCCATCTGCTGAACAACCAAGACCTATTGTCGAAGAAGAATTGTCCAAGAAGTCTCAAAAATGGGACGAAATGAACATTTTAGCCACT
IDR-032	TATCATCCAGCTGACAAGGACTACGGTTTGATGAAAATTGACGAACCAAACACTCCATACCACAACATGATTGGTGATGATGAAGATGCTTACTCTGATTCTGAAGGTAACGAAGTTATGACCCCTGACATCTTGGCTAAGAAATTAGCCGCTGCTGAAGGTTCCGAACCAAAGTACAGAACCAGAGAACAAGAATCTTCTGGTGAAGAGGACAATGACTTGTCTCCAGAAGAAAGAGAAAAGAAGCGTCAATTCGAAATGAAGAGAAAGTTACACTACAACGAAGGTTTGAACATCAAGCTAGCCAGACAATTGATCTCCAAGGATTTGCACGATGACGATGAAGACGAAGAAATGGCTGAAACTGCTGATGGTGACTCCATGAACGTCGAAGAATCC…
IDR-033	ATGGAAACTTTGAAGTCCAAGACCAAGACCAGAGTTTTGCCATCTTGGATGACCGCCCCAGTTGACGAAAGAAAGGTTGTCTCCGTCAAGACTGCTACCAGAAAACAAACTGCCGCTTGGGCTCAACGTGTCGGTGCTGCCACTAGAGCCCCAGCTACTGAAACCGTCTACTGTATGAACGAAGCTGAAATGGTTGATGTTGCTTTGGGTATCTTGATTGAAGGTAGAAAGCAAGAAAAGCCATGGGAACAAAGATCCTTGGAAGCCACTGACAAGTTGCAATTATCCCCTCCTTGTTCTAGCAGTCCAGGTTCTTCATCTGAAGAAGAAGACTCTAGAATCTCTTCCTTAGCTCCAGGTTTGTCTCCACCAAGAGGTCCAGAAGCTTCTGATTCTCCA…
IDR-034	ATGTTATGGCAAAAGTCTACTGCCCCAGAACAAGCTCCAGCTCCTCCAAGACCATACCAAGGTGTTCGTGTCAAAGAACCAGTCAAGGAATTGTTGAGAAGAAAGAGAGGTCACACTTCCGTTGGTGCTGCTGGTCCACCAACCGCCGTTGTTTTGCCACACCAACCATTGGCTACTTACTCTACCGTCGGTCCA
IDR-035	ATGGATGTTTTCAAGAAGGGTTTCTCCATCGCCAAGGAAGGTGTTGTCGGTGCCGTTGAAAAGACTAAGCAAGGTGTCACTGAAGCTGCTGAAAAAACCAAAGAGGGCGTTATGTACGTTGGTGCTAAGACCAAAGAAAATGTTGTTCAATCCGTTACTTCAGTCGCTGAAAAGACCAAGGAACAAGCTAACGCTGTCTCTGAAGCCGTCGTTTCTTCTGTTAACACTGTTGCTACCAAGACTGTCGAAGAAGCTGAAAACATTGCTGTCACCTCCGGTGTCGTCAGAAAGGAAGACTTGAGACCATCTGCTCCACAACAAGAAGGTGAAGCTTCCAAGGAAAAGGAAGAAGTTGCCGAAGAAGCTCAATCTGGTGGTGAC
IDR-036	ATGGAATCTTCTGCTAAGATGGAATCCGGTGGTGCTGGTCAACAACCTCAACCACAACCACAACAGCCATTCTTGCCACCAGCTGCTTGTTTCTTTGCTACTGCTGCTGCTGCCGCCGCAGCCGCTGCTGCCGCTGCTGCCCAATCCGCTCAACAACAACAACAACAACAACAACAACAACAACAAGCTCCACAATTGAGACCAGCTGCTGACGGTCAACCATCTGGTGGTGGTCACAAATCAGCCCCAAAGCAAGTTAAGAGACAACGT
IDR-037	AGAAGAAATGAAAGAGAAAGAAACAGAGTTAAATTAGTCAACTTGGGTTTCGCCACTTTGAGAGAACACGTTCCAAACGGTGCTGCTAACAAGAAGATGTCCAAGGTTGAAACCCTACGTTCTGCTGTCGAATACATCAGAGCTTTGCAACAATTGTTGGACGAACACGATGCC
IDR-038	GAAAATTTTTCACGTAAGAGATACAGATCCGTTGACTTATCCAAAGAAAACGATGACAGAAAGCAAAACGAAAACAAGTCTTTGAAGGAATCTGAAACCTCCGGTCCAACTGCTGCTCCAATGTGGGCTGTCGCTCCTCCATCTAGATCCGGTGCTGGTAACACTTTCTGGATGTTGCCAGTTCCAACCACTGCCGGTAACCAAATGGAATCCAGTTCTAACAACAACACCGCCGCTGGTCACAGAGCCCCACCAATGTGGCCATTCGTCAACTCTGCTGGTGGTGGTGCCGGTGGTGGC
IDR-039	GGCGGTGCTGCCACCCACTTCATGGCTGGTACTGGTTTCTCTTTCCCAATGGACCAATACAGAGGTTCTCCATTGCAATTGGGTTCCTTTCTAGCTCAACCTCAACCAACTCAAAACTTAGGTTTGTCCATGCCAGACTCTAACTTGGGTATGTTGGCTGCTTTGAACTCTGCTTACTCTCGTGGTGGTAACGCCAATGCCAACGCTGAACAAGCTAACAACGCTGTTGAACACCAAGAAAAGCAACAACAATCTGATCATGATGATGACTCCAGAGAAGAAAACTCCAACAGTTCAGAA
IDR-040	ATGCAAGAACAAGCCACCTCTAGTTTAGCTGCTTCTTCTTTGCCATCTTCCTCTGAACGTTCATCCTCCTCTGCTCCACACTTGGAAATCAAGGAAGGTATTGAATCCGACGAAGAAATCAGAAGAGTTCCAGAATTCGGTGGTGAAGCTGTCGGTAAGGAAACCTCCGGTAGAGAATCTGGTTCTGCCACTGGTCAAGAAAGAACTCAAGCTACTGTTGGTGAATCTCAA
IDR-041	TCAAGTTTGATGGGTCCAAACGGTAACTCTAAAACCATGATTAATGGTTCTTACAACAAGAGAGACTTGATCAGAGGTAGACGTGGTGAATTATTCTCTGCTCCAGCTTCCATGAGAACTTCTCCAACCAACTCCGGTCACTTGAGAGTTTCTACTGCTGGTTTGTCTAGCTCCTCTGGTTCCACTTCCTCTTCTTCTTCTGATTCTACCATGGAAGAATTGCAAGCCGCTATCCAAGCTGCCATTGCTCACTGTAAGAACTCCTCCGCTGTTGACAGAGATGACAAGGTCAAGGATTCC
IDR-042	ATGGCTGAAGAATACAAGAACACTGTTCCAGAACAAGAAACTCCAAAGGTTGCTACTGAAGAATCCTCTGCCCCAGAAATCAAAGAAAGAGGTATGTTCGATTTCTTGAAGAAGAAGGAAGAAGTCAAGCCACAAGAAACCACCACTTTGGCTTCTGAATTTGAACACAAGACTCAAATCTCTGAACCTGAATCTTTCGTTGCCAAGCACGAAGAAGAAGAACATAAGCCTACACTATTGGAACAATTGCACCAAAAGCACGAAGAAGAGGAAGAAAACAAGCCATCTTTGTTGGACAAATTACACAGATCCAACTCCTCCTCATCTTCCTCCAGTGATGAAGAAGGTGAAGATGGTGAAAAGAAGAAGAAAGAAAAGAAGAAGAAAATTGTCGAAGGT…
IDR-043	ATGGCTGAAGAAATCAAGAACGTTCCAGAACAAGAAGTTCCAAAGGTTGCTACTGAAGAATCCTCCGCCGAAGTCACTGACAGAGGTCTATTTGATTTCTTGGGTAAGAAGAAGGATGAAACCAAGCCAGAAGAAACTCCAATTGCTTCTGAATTCGAACAAAAGGTCCACATTTCTGAACCAGAACCAGAAGTTAAGCACGAATCTTTGTTGGAAAAGTTGCACCGTTCTGACTCTTCTTCATCCTCTAGTTCCGAAGAAGAAGGTTCCGACGGTGAAAAGAGAAAGAAGAAAAAAGAAAAGAAAAAGCCAACCACCGAAGTGGAAGTCAAGGAAGAAGAGAAGAAGGGTTTCATGGAAAAGTTGAAGGAAAAATTGCCAGGTCACAAGAAACCTGAA…
IDR-044	GGTGAAAGACACTTGTTGAAGAACATCAAGAGACGTAAAACTTCCTCTCAAACCCAAACTCAATCTTTGGAAGGTGAAATTCACGAACTAAGACGTGACAGAATGGCTTTGGAAGTTGAATTAGTCAGATTGAGAAGAAAGCAAGAATCC
IDR-045	TCCTCTGACCAAAGAACTTTGAGAAGACTAGCCCAAAACAGAGAAGCTGCTCGTAAATCCAGATTACGTAAGAAGGCTTACGTCCAACAATTGGAAAACTCTAGAATCAGATTGGCTCAATTGGAAGAAGAATTGAAGAGAGCCAGACAACAAGGTTCTTTGGTTGAAAGA
IDR-046	ATCTTATTGAAGGGTAAGAAGTTGGGTGGTTTGTTGCCAGCTGGTGGTGAAAACGGTTCTGAAGCCACTGATGTCTCCGACGAAGTTGAAGCTGCTGAAATGGAAGATGAAGCTGTCAGATCCCAAGTTCAACACAAGCCAAAGGAAGACAAGCTAAAATTGGTTCCAGAATTG
IDR-047	GACAGAATGAAGAAGTTGATTGAAGATCCTGACAAGTTCTACACTCCAAAGACCAGACCATCTGGTCACGATATTGGTAAGTCTTTCTCCAAGGACAACGGTGGTTCCATCCCACCAAACTTGTTGCAAATCTCTAACTCTGAATCCAATGGTCAATACTTAGCTAACTGTAAA
IDR-048	CAAATCTCTACTATTGCTGAATCCGAAGATTCTCAAGAATCTGTTGACTCTGTCACTGACTCCCAAAAGAGAAGAGAAATCTTATCCCGTAGACCATCTTACAGAAAGATTTTGAACGACTTGTCCTCAGATGCCCCAGGTGTTCCAAGAATTGAAGAAGAAAAATCTGAAGAAGAAACC
IDR-049	CCAATCCCAGAATTGGACGATGCTGTCGTTGAATCTTTCTTCTCTTCTTCCACTGACTCTACTCCAATGTTCGAATACGAAAACTTGGAAGACAACTCCAAGGAATGGACTTCCTTATTTGATAACGACATTCCAGTTACCACCGATGAC
IDR-050	CGTGCTAGAAACACTGAAGCTGCTAGAAGATCCAGAGCCAGAAAGTTGCAAAGAATGAAGCAATTGGAAGACAAGGTTGAAGAATTGTTGTCCAAGAACTACCACCTAGAAAACGAAGTTGCTAGATTGAAGAAATTAGTCGGTGAAAGA
IDR-051	ATGTCTTCCAAGGAACAAAAGACTCCAGAAGGTCAAGCTCCAGAAGAAATCATCATGGACCAACACGAAGAAATTGAAGCCGTCGAACCAGAAGCTTCTGCTGAACAAGTTGACCCAAGAGATGAAAAAGTTGCCAACTTGGAAGCTCAA
IDR-052	AAAAAGTTGGAAGAAGAAACTGAACCAGCTGCTATGGACAGAGTTAAGGCTGAAGTCAGATTGATGATTCAAAAGGCCCGTTTAGAAAAGAAGATGTCTCAAGCTGATTTGGCCAAGCAAATCAACGAAAGAACCCAAGTTGTCCAAGAA
IDR-053	CAAGGTTCCGGTGGTCAAACTCAAACCCAATCTCAAGCCACTGCTTCTGCTACCACTGGTGGTGCTACCGCTCAACCACAAACCAAGCCAAAGGTCAGAGCTAGAAGAGGTCAAGCTACTGACCCACACTCCATTGCTGAAAGATTGAGAAGAGAACGTATCGCCGAAAGAATGAAATCTTTGCAAGAATTAGTTCCAAACGGTAAC
IDR-054	ACCACTATGCAATCTTTGTGTGGTTCCTCATCCTCCACTTCTTCTTACTACCCATTGGCCATTTCTGGTATCGGTGAAACCATGGCTCAAGACAGAGCTTTGGCTGCCTTAAGAAACCACAAGGAAGCTGAACGTAGAAGAAGAGAAAGAATCAACTCTCACTTGAACAAGTTGAGA
IDR-055	CCAGTCTTGTTGGAAGTTGAAGTCGACAAGAAAGTTCCAGTTTTGCCAATGGTTGCTGGTGGTTCTGGTTTAGATGAATTCATCAACTTCGACCCAGAAGTCGAACGTCAACAAACTGAATTGAGACACAAGAGAACCGGTGGTAAGCAC
IDR-056	GAAAAGTTGTTGGACACTATGAACAGATTGGATGACAAATACAGAGAATTGAGATCCCAATTGTCCAACAAGTCTTTGGCTCCAGAAGTTCACCAACAAATTTCCAAGCAACTAGCCGATCGTGAAAGAGAATTATTGCCAATCTACGGTCAAATCTCT
IDR-057	TCTTTGGTCCACATGGACATCAAGCCATCTAACATCTTCATCTCCAGAACTTCAATTCCAAACGCCGCTTCTGAAGAAGGTGATGAAGATGACTGGGCTTCCAACAAGGTTATGTTCAAAATTGGTGACTTGGGTCACGTTACCAGAATT
IDR-058	ATGTCTGCTACTGCTGCCACTGTTCCACCAGCTGCTCCAGCTGGTGAAGGTGGTCCACCAGCCCCACCTCCAAACTTGACCTCCAACAGACGTCTACAACAAACTCAAGCTCAAGTCGATGAAGTTGTCGACATCATGAGAGTTAACGTTGACAAGGTCTTGGAAAGAGACCAAAAGTTGTCTGAATTAGATGACAGAGCTGATGCTTTGCAAGCCGGTGCTTCTCAATTCGAAACCTCCGCCGCTAAATTGAAGAGAAAGTAC
IDR-059	GATGTCGATTTCGGTGATTCTGACAACGAAAACGAACCAGACGCTTACTTGGCCAGATTGAAAGCTGAAGCTAGAGAAAAGGAAGAAGATGACGACGATGGTGACTCTGACGAAGAATCTACTGATGAAGACTTCAAGCCAAACGAAAATGAATCTGATGTTGCTGAAGAATACGACTCCAACGTTGAATCCGACTCCGATGAC
IDR-060	GATTCAGATGCTTCTGGTGGTGGTGGTGACTCTGACGGTGCCAAGAAAAAAAAAGAAAAAAAGTCTGAAAAGAAGGAAAAGAAGGAAAAGAAGCACAAGGAAAAGGAAAGAACTAAGAAGCCATCCAAGAAGAAGAAGGACTCCGGTAAG
IDR-061	GGTGGTGACTCCGACAATGAAAAGGGTGGTAAGAGTTCAAAAAAGAGAAAGACTGAACCTTCTCCATCTAAGAAGGCTAACACTTCCGGTTCTGGTTTCAAGTCCAAGGAATACATCTCTGATGACGACTCTACCTCTTCTGACGATGAAAAGGACAACGAACCAGCTAAGAAAAAATCCAAGCCACCATCCGATGGTGATGCTAAGAAGAAGAAGGCCAAGTCTGAATCTGAACCAGAAGAATCCGAAGAAGATTCTAACGCCTCCGATGAGGACGAAGAAGACGAAGCTTCTGAC
IDR-062	CACTCTTCTAGACCATCCCAAAACATTGCTGCCGGTTTGGAATCTCCAGACCAACAAGCTGGTGCTCAAATCTTGGGTCAATGTGGTACTGGTGGTTCCGATGAACCATCTGAACCTTCCAGAGCTGAAGACCCAGGTCCAGGTCCATGG
IDR-063	GCCACTTACAACAATGCTACTGAACAAGAAGGTAAGACCTACATCCAAGGTGAAACCCCAGAACAAGCTAACGCTAGATACTTGAAGAGAGTTGGTGCTGCCAACAACCAAAACCCAGCCGCTGAAGACAAGGGTGCTACCACTCCAGCTTCCAAGGAAGAAGCCAAGAAGTCTGAAGCTGCTGCTAAGAACGCCGGTAAAGCTGCTGGTAAGGCTTTGCCAAAGACTTCTGCTGTCAAA
IDR-064	GGTGCTATCCAATTGACCGAAGCTTTGAGAATGCAAATGGAAGTTCAAAAGCAATTGCACGAACAACTAGAAGTCCAAAGAGTTTTGCAATTACGTATTGAAGAACACGCCAAGTACTTGGAAAAGATGTTGGAAGAACAAAGAAAGACTGGTAGATGGATCTCTAGTTCATCCCAAACTGTCTTGTCTCCATCTGATGATTCCATCCCAGACTCTCAAAACATGTCCAAGACCAAAGCCTCCTCTCCACAACCACCATTGCCAGCTGAAAACAAGGCTTCTGAAACTGAAGATGACAAGTGTGAATCTCCTCAAAAAAGAAGAAGATTAGAGAACATTGCTGAATCCGAAGACCCAAAGCGT
IDR-065	GAATTCTGTATCCCAACTTCCTCCACCATTGAACAACAAAATTCTGCTAGAATCAGACAAAACACCAGAGAACACCCATCTACTGCCAACACTGTTGACAGAACCAACCACCAATTAGAAAACTTGGAAGCTGAAACTGCTCCATTGCCA
IDR-066	ATGCCAAGAGGTTTCTTGGTCAAGAGATCCAAGAAATCAACTCCAGTCTCTTACAGAGTTCGTGGTGGTGAAGATGGTGACAGAGCTTTGTTGTTATCTCCATCTTGTGGTGGTGCCAGAGCTGAACCACCAGCTCCATCCCCAGTTCCT
IDR-067	AGCTCTGTCTCTGCCTCCTCTTCTCCATCCCCTTCCACTCCAACCAAATCTGGTAAGATGAGATCCAGATCCAGTTCACCAGTTAGACCAAAGGCTTACACCCCATCTCCACGTTCTCCAAACTACCACAGATTCGCTTTGGACTCCCCACCACAATCTCCAAGAAGATCCTCTAACTCTTCCATCACTAAGAAGGGTTCCAGAAGATCCTCCGGTTCTTCTCCAACTAGACACACTACCAGAGTTTGTGTC
IDR-068	GCTACTATCAAGAGATTGAAACGTTCTCCAGACAAGCAAGCCGCCGCTTTGCCAAGAAGAGAAAGAAACAGACAAGCTGCTGCTGCTTCTCCAGAAAACTCCAGAGGTAAGGGTAGAAGAGGTCAAAGAGGTAAGAACCGTGGTTGTGTT
IDR-069	GCTACTGGTTTCGTCAAGAAAGATCAATTGGGTAAGAACGAAGAAGGTGCTCCACAAGAAGGTATCTTGGAAGACATGCCTGTTGACCCAGACAACGAAGCTTACGAAATGCCATCTGAAGAAGGTTACCAAGATTACGAACCAGAAGCC
IDR-070	GAAGAAAACAGAACTGAAGCTCCAGAAGAAACCGAACCAGAAAGAGAAACTCCTTCCGCCATCAACGGTAACCCATCTTGGCACTTGGCTGACTCTCCAGCTGTCAATGGTGCTACCGGTCACTCATCCTCTTTGGATGCCCGTGAAGTT
IDR-071	TCAGGTGTTAACAAGTCTGACAAGAAGGTTACCCCAACTGAAGAAAAGGAACAAGAAGCTGTCTCCAAGTCCACTTCTCCAGCTGCTAACTCTGCCGATACTCCAAACGAAACCGGTAAGAGACCATTGGAAGAAGAAAAGCCACCTAAA
IDR-072	GCCATGCAAGAATGTATGCAAAAATACCCAGACTTGTACCCACAAGAAGACGAAGATGAAGAAGAAGAAAGAGAAAAGAAGCCAGCTGAACAAGCTGAAGAAACTGCTCCAATCGAAGCTACTGCCACCAAGGAAGAGGAAGGTTCTTCC
IDR-073	ATTTTGTTCAAGGACAACGAAAAGTCTTGTCAAAACAAAGAATCTAACAAGGATGACACTAAGGAAGCTAAGGAATCCAAGGAAAATAAGGAAGTTTCCTCTCCAGACGACTTGGAATTGGAATTAGAAAACTTGGAAATCAACGATGAT
IDR-074	TTGTGTGGTAGACCAGGTAGAGGTCAAACTCAACAAGAAGAAGAAGAAGAAGATGAAGACCACGGTCCAGATGACTACGACGAAGAAGATGAAGACGAAGTTGAAGAAGAAGAAACCAACAGATTGCCAGGTGGTAGATCCAGAGTCTTA
IDR-075	CAACCATACGAAAAAAAAGCTGCCAAGTTGAAGGAAAAGTACGAAAAGGACATCGCCGCTTACAGAGCTAAGGGTAAGCCAGACGCTGCTAAGAAAGGTGTTGTCAAGGCTGAAAAGTCTAAGAAGAAGAAGGAAGAAGAAGATGATGAAGAAGATGAAGAAGACGAAGAGGAAGAAGAAGAAGAAGAAGATGAAGACGAAGAAGAAGACGACGATGACGAA
IDR-076	ATGAGAGTCAAGGGTCCATCTTCCCGTCGTAAAAAGAAGAAGATTTTGAAGTTGGCTAAGGGTTACAGAGGTCAAAGATCCAGATCCTACAGAAGAGCCAAGGAAGCTGTTATGAGAGCTTTGTACTACCAATATCGTGACAGAAAATTGAGAAAGAGAGAATTCAGAAGATTATGG
IDR-077	TTAGAAGAACAAAAGTTGCAAATCCAAGTTGAATTGTTGGAACTAGAAAAGCAAAGATTCAGATGGCAACGTTTCTCTAAGAAGAGAGATCAAGAATTAGAAAGAATGAGAATGGAAAACGAACGTATGAAATTGGAAAACGACAGAATGGGTTTGGAATTGAAGCAAAGAGAATTGGGTGTCGAA
IDR-078	AATGACCACTCTGACTCTTCCAACAAGAAGAGATTGTGTGGTAACCGTGAAGCTGTCAGAAAGTACAGAGAAAAGAAGAAAGCCAGAACTGCTTACTTGGAAGATGAAGTTATGAGACTACAATCTTTGAACGAACAATTCTTGAGAAAGTTGCAATCCCAAGAAATGGTTGAAACCGAATTGATCAGATTACGTGCTTTGTTAGTCGAAATGCAA
IDR-079	TTAGATGGTTTGCACAACGAATTGCAAACTATCGGTTTCCAAATCGAAACCATTGGTAAGAAGGTTTCCTCCAAGAGAATCCCATACGCTCCATCTGGTGAAATTCCTAAATTCTCTTTGCAAGACCCACCAAACAAGAAGCCAAAGGTC
IDR-080	GCTGAAGAATCTTCTAAGATCAGAGCCCCAACTACCATGAAGAAGTTCGAAGACTCTGAAAAGGCTAAGAAGCCTGTCAGATCCATGATTGAAACCAGAGGTGAAAAGCCAAAGGAAAAGGCCAAGAACAGTAAAAAAAAGGGTGCTAAGAAAGAAGGTTCTGATGGCCCATTGGCTACTTCCAAGCCAGTTCCAGCTGAAAAGTCTGGTTTGCCAGTCGGTCCAGAAAACGGTGTTGAATTATCAAAGGAAGAATTGATTAGAAGAAAGAGAGAAGAATTCATCCAAAAGCACGGTCGTGGTATGGAAAAATCCAACAAGTCCACTAAATCTGACGCCCCAAAGGAGAAGGGTAAGAAGGCTCCAAGA
IDR-081	CTACAAGCCCAAAACCCATTGACTGAATCTGAAAGAAGATCCATGGAAGACCAAATCGAACGTTTGAAGAACGAAAAGGAAGGTTTGTTGGCTGAATTACAAAACCAAGAACAAGAAAGAAAGGAATTCGAATTGCAAGTTACCACTTTGAAAGAT
IDR-082	TTCGGTCCATTGTTGCCAACTGAATCTGAAAGATCCTTGATGGAAAGAGTTAGACAAGAATTAAAATTGGAATTGAAGCAAGGTTTCAAGTCCCGTATTGAAGATGTCAGAGAAGAAATCATGAGAAAGAGAAGAGCTGGTAAGCTACCAGGTGACACTACC
IDR-083	GAATCCTCTGACCAAGCTAAAGAAGAAGAGGAAAAGGAAGAAGAAGAAGAAGAACGTGACTCCATGATGGGTCAAAAGATTGACGGTTCTGAAGGTGAAGATATCCAAATCTGGGGTGAAGAAGAAGTTAGAAGATTGATGGAAATTGATGCC
IDR-084	GTTTCTCCAACTCGTTCTGTCTTACCTGCTAACTGGAGACAAGAATTGGAATCTTTGAGAAACGGTAACGGTTCTAGTTCTGCCGCCTCCTCCGCCCCAGCTCCAGCCAGATCCTCTTCTGCTTCTTGGAGAGACGCTGCTCCAGCTTCTTCTGCTCCAGCTAGATCCTCATCCGCTTCCAAGAAGGCT
IDR-085	GTTACTCCATCTCGTTCTGCTCTACCATCTAACTGGAAGCAAGAATTAGAATCCTTGAGATCCTCTTCTCCAGCTCCAGCCAGCTCCGCACCAGCTCCAGCTAGATCCTCTTCAGCTTCTTGGAGAGACGCTGCCCCAGCTTCTTCTGCTCCTGCTAGATCCTCCTCTTCGAAGAAGGCTGTCACTCCATCCAGATCCGCTTTGCCATCCAACTGGAAACAAGAATTGGAATCTTTGAGATCCTCTTCCCCAGCCCCAGCTTCCTCTGCCCCAGCTCCAGCCAGATCCTCTTCTGCTTCCTGGAGAGATGCTGCTCCAGCTTCTTCCGCCCCTGCCAGATCCTCTTCTGCCTCTAAGAAGGCTGTTACCCCATCTAGATCCGCTTTGCCAAGTAATTGG…
IDR-086	GGTTCCTCCGTTAAGAGACAATCTACTGCCAGAACCAGATCCTTCACTGAAACCAACAGAAGAACTCCATCTGTCCAATCCAAGCACGAATTCTGGGAGGACCCAGACGATGGTTCTGATTCTGAAAACGAATACGAAGGTGAAGAAGAAGACGGTATCGGTAACGATCTAGATAATGAATCTGACTGGGAAGATGACTCCAGAGTTCAAAAATTAACCACCACTGACAACTACGAAGAAGAATTGGCTAAGGAAGTTGAACAATTGTTGGAACCAGAAGAACGTGTCATCTTGCAACAAAACGAAAAGCCAAACTTGAAGATGATTTCAACT
IDR-087	GTCACCCAAGTTGCCAAGCAAGAAAGAAAGAAGAACAGAAGAGGTGGTGCCAAACGTCTAGATGAATCCGAAATTGAACCAGAAAACTTGGTTCCAGAAGAATGGAGAGATATCCAAGCTGAAGTCAATTTAACCAAGAAGGACAAGAGAAAGATTGCTCAAGAAATGGAATTCGGTGTCAGAGTTGAAAAGAAGAGACAAGGTTTGATCCCATTAAGAAAGGTTGACTTGAACGATTTCTTGACTTACAAGGAAGCTAAGTTGGCCCAATTGAGACCAGTTATCTTGGACAAGCCAGGTAACTTTTCCGATGACTCTGGTGCTTCTTCTGATGGTGAAACTGCTGTTTCCTCTCCATCTGAACGTGTCGCTCCAAAGAACCCAAGATGGGCTGTCTAC…
IDR-088	GAACAAGTTTCCCACGGTACTCAAAACAGACCATTGTTGAGAAACTCTTTGGATGACTTGGTCGGTCCACCATCTAACTTGGAAGGTCAATCTGATGAACGTGCCTTATTGGACCAATTGCACACTTTACTTTCCAATACCGATGCTACCGGTTTGGAAGAAATTGACAGAGCTTTGGGTATCCCAGAATTGGTTAACCAAGGTCAAGCTCTA
IDR-089	CAACAACAAATTCAACACAGATTGCAACAAGCTCAATTGATGAGAAGAAGAATGGCTACCATGAACACCAGAAACGTCCCACAACAATCTTTACCGTCTCCAACTTCAGCTCCACCTGGTACTCCAACTCAACAACCATCTACACCACAAACTCCACAGCCACCAGCTCAACCACAACCAAGTCCTGTTTCTATGTCTCCAGCCGGTTTCCCATCTGTTGCTCGTACTCAACCCCCAACCACTGTCTCCACTGGTAAGCCAACCTCTCAAGTTCCAGCTCCACCACCCCCAGCTCAACCACCACCAGCTGCTGTTGAAGCCGCCCGTCAAATCGAAAGAGAAGCTCAACAACAACAACACTTGTACAGAGTTAACATCAACAATTCCATGCCACCAGGT…
IDR-090	GTCCAACCACCAAGATCCATCTCTCCATCTGCTTTGCAAGACTTGTTGAGAACTTTAAAATCCCCATCCTCTCCACAACAACAACAACAAGTCTTAAATATTTTGAAGTCTAACCCACAATTGATGGCTGCTTTCATCAAGCAAAGAACCGCCAAGTACGTTGCCAACCAACCAGGTATGCAACCTCAACCAGGTTTGCAATCTCAACCAGGTATGCAACCACAGCCAGGTATGCACCAACAACCTTCACTACAAAACTTGAACGCTATGCAAGCTGGTGTTCCACGT
IDR-091	ATGACCCCATCCACTCCTCCAAGATCCAGAGGTACCCGTTACTTGGCTCAACCAAGTGGTAACACCTCATCTTCTGCTTTGATGCAAGGTCAAAAGACCCCACAAAAGCCATCTCAAAACTTGGTTCCAGTTACACCATCCACCACCAAGTCTTTCAAGAACGCTCCATTACTAGCCCCACCAAACTCCAACATGGGTATGACTTCTCCATTCAACGGTTTGACCAGCCCTCAAAGATCCCCATTCCCAAAGTCCTCTGTCAAAAGAACTTTGTTCCAATTCGAATCTCACGACAACGGTACTGTCAGAGAAGAACAAGAACCATTGGGTAGAGTTAACAGAATTTTATTCCCAACCCAACAAAACGTTGACATTGACGCTGCTGAAGAAGAAGAAGAA…
IDR-092	ATGTCTGAATCCAGTTCCAAGTCTTCTCAACCATTGGCTTCCAAACAAGAAAAGGACGGTACTGAAAAGAGAGGTCGTGGTCGTCCAAGAAAGCAACCTCCAGTTTCTCCAGGTACCGCCTTAGTCGGTTCCCAAAAGGAACCATCTGAAGTTCCAACTCCAAAGAGACCAAGAGGTAGACCTAAAGGCTCAAAGAACAAGGGTGCTGCTAAGACCAGAAAGACTACTACCACCCCAGGTAGAAAGCCAAGAGGTAGACCAAAGAAGTTGGAAAAAGAAGAAGAAGAAGGTATCTCTCAAGAATCTTCCGAAGAAGAACAA
IDR-093	ATGTCTGCCAGAGGTGAAGGTGCTGGTCAACCTTCCACTTCTGCTCAAGGTCAACCAGCTGCTCCAGCCCCTCAAAAAAGAGGTAGAGGCCGTCCAAGAAAGCAACAACAAGAACCAACTGGTGAACCATCCCCAAAGAGACCACGTGGTAGACCAAAGGGTTCCAAGAACAAGTCTCCATCTAAGGCTGCCCAAAAGAAAGCTGAAGCTACCGGTGAAAAGAGACCAAGAGGTAGACCAAGAAAGTGGCCACAACAAGTTGTCCAAAAGAAGCCAGCTCAAGAAGAAACTGAAGAAACCTCATCTCAAGAATCCGCTGAAGAAGAC
IDR-094	TTACCAAGACGTCCTGGTCATGATGACGGTCAAAGACCATCCGGTGGTGCTGCTGCTGCCCCAAGAAGAGGTGCTCAATTGAGAAGACCAAGACACTCTCACCCAACTAGAGCTAGAAGATGTCCAGGTGGTTTGCCAGGTCACGCTGGTGGTGCTGCTCCAGGTCGTGGTGCCGCTGGTAGAGCCAGATGTTTGGGTCCATCTGCTAGAGGTCCAGGC
IDR-095	ATGTCTGAACGTCAAGGTGCCGGTGCTACCAACGGTAAGGACAAGACTTCTGGTGAAAACGATGGTCAAAAGAAGGTCCAAGAAGAATTTGACATTGACATGGATGCTCCAGAAACTGAAAGAGCTGCTGTTGCCATCCAATCTCAATTCAGAAAGTTCCAAAAGAAAAAGGCTGGTTCCCAATCC
IDR-096	ATGGACTCCAAGTCTGTCACTCCAGAACCAACCAACCCATTCTACGCCTCCTCCGGTCAATCTGGTAAGACTTACGCTTCTGTTGTTGCTGCTGCCGCCGCCGCTGCTGCTGACAAAGAAGACGGTGGTGCTGTTTCCTCTGCTAAGGAATTGGACTCTTCTTCCGAAGCTGTCTCTGGTAACTCTGACAAGGTTGGTGCTGATGACTTAAGTGATTCTGAAAAAGAAAAGCCAAACTTGGTCGGTGACGGTAAGGTCTCCGATGAAGTTGATGGTTCTTTGAAGGAAGATTCA
IDR-097	GATTCAGCCGAGGAAGATGAAAACAAATTACCAGTTGAAGACATTGTCAGTTCCAGAGAATTCTCTTTCGGTGGTAAGGAAGTTGACCAAGAACCATCTGGTGAAGGTGTTACCAGAGTTGATGGTTCCGAATCTGAAGAAGAAACCGAAGAAATGATTTTTGGTTCTTCTGAAGCTGCTAAGCAATTCTTGGCTGAATTGGAAAAGGCTTCTTCCGGTATCGAAGCTCACTCTGATGAAGCCAATATCTCCAACAACATGTCTGACCGTATTGACGGTCAAATCGTCACTGATTCCGACGAAGATGTCGACACTGAAGACGAAGGTGAA
IDR-098	CAAGACAAGAAGACCATGATGATGAACGAAGAAGACGATGGTAACGGTATGGACGAATTGTTGGCTGTCTTGGGTTACAAAGTCAGATCCTCTGAAATGGCTGATGTTGCTCAAAAGTTGGAACAATTGGAAGTTATGATGTCTAACGTTCAAGAAGATGACTTGTCTCAATTAGCCACTGAAACTGTCCACTACAACCCAGCTGAATTATATACCTGGTTGGACTCCATGTTGACTGATCTAAATCCACCATCCTCCAACGCTGAATACGATTTGAAGGCTATTCCAGGTGACGCCATCTTGAACCAA
IDR-099	CTAACCAACAACGTTTTGTCCACTGCTCAACAAGTCTACTTGAGAAAGTTGGGTGGTGCCAAACCAAACATGGATGAAAATGCTTCCAAGATCATCTCTGCCGGTAGAGCTAAGCGTAGTATTGCTCAACCAGACGATGCTGGTGAAAGATTCAGACAATTGAAGGAACAAGAAAAGAGATCAAAGAAGAACAAGGCTGTTGCCAAGGACACTGTTGAATTAGTCGAAGAATCTCAATCTGAATCCGAAGAAGGTTCTGATGACGAAGAGGAAGAAGCTAGAGAAGGTGCTTTGGCTTCTTCTACCACTTCTAAGCCATTGCCAGAAGTTGGTCAAAGAAGATCCAAACGTTCCAAGAGAAAGAGAACCGTC
IDR-100	GACTGTGAATCCAAGCCATTCTCTGGTGGTGTTGAACCAATGTACTGTTTGGAAAATGGTGCTGAAGAAATGAAGAGAGGTGTCAAAGCTGACAAGCACTGGTTATCTGAATTCGAACACAACTACTGGTCTGATATCTTGAAGGAAAAAGAAAAGCAAAAGGAACAAGGTATTGTCGAAACTTGTCAACAACAACAACAAGATTCTTTGTCCGTTGCCGACTACGGTTGGCCAAACGATGTTGACCAATCACATTTGGACTCCTCTGACATGTTCGATGTCGATGAGTTGTTGCGTGATTTGAACGGTGACGACGTTTTCGCTGGTTTGAACCAAGACAGATACCCAGGTAACTCTGTTGCTAACGGTTCTTACAGACCAGAATCTCAACAATCCGGT…
IDR-101	GACTTGTGTCAACTATCTGCTGAAACCAAAAAAACTCCATCCCGTTCCGCCAGAAGAAAGAAGGCTAAGAGACAATGGTTGAGAGAAAAGACCAAGTTGGAAAAGGAAGAATTGTTGCAAACTCAATTAGTTGTTGCTCCATCTCAAAAGCCAGTC
IDR-102	GCCGACTTGAAGAAGGAATTATCTGGTTCATCCAAAAAGGGTGAATTGCCACCAGGTCGTTCCACTGTTGCTGCTTCTACCAGATACCCATTCAAGGACTCTGAAATCGAAAACGAATTGAACGAATTGAGAAGAAAGGCTAACGATTTC
IDR-103	ATGTCTGAACCAGCTGGTGATGTCAGACAAAACCCATGTGGTTCCAAGGCTTGTCGTCGTTTATTCGGTCCTGTTGACTCCGAACAATTGTCCAGAGACTGTGATGCTTTGATGGCCGGTTGTATCCAAGAAGCTAGAGAAAGATGGAACTTCGACTTCGTCACTGAAACCCCATTGGAAGGTGATTTTGCTTGGGAAAGAGTTAGAGGTTTGGGTCTACCAAAGTTGTACTTGCCAACCGGTCCAAGAAGAGGTCGTGATGAATTAGGTGGTGGTAGAAGACCAGGTACCTCACCAGCCTTGTTGCAAGGTACTGCTGAAGAAGACCACGTCGACTTGTCTTTATCCTGCACTTTGGTTCCAAGATCCGGTGAACAAGCTGAAGGTTCTCCAGGTGGC…
IDR-104	AAGGGTACTTCCACCAGAAAGCCAAGAATCAACTCTCAATTGGTCGCCCAACAAGTTGCTCAACAATACGCTACTCCACCTCCACCAAAGAAGGAAAAGAAGGAAAAGGTTGAAAAGCAAGATAAAGAAAAACCAGAAAAGGACAAGGAA
IDR-105	ATGTCTGACGCCGCTGTCGACACTTCCTCTGAAATCACCACTAAGGACTTGAAGGAAAAGAAAGAAGTTGTTGAAGAAGCTGAAAACGGTAGAGATGCTCCAGCTAACGGTAACGCTGAAAATGAAGAAAACGGTGAACAAGAAGCTGACAACGAAGTCGATGAAGAAGAAGAAGAAGGTGGTGAAGAAGAAGAAGAAGAGGAAGAAGGTGATGGTGAAGAAGAAGACGGTGACGAAGACGAAGAAGCCGAATCCGCCACTGGTAAGAGAGCTGCTGAAGATGATGAAGACGACGATGTTGACACCAAGAAGCAAAAGACCGATGAAGATGAC
IDR-106	ATGTCTGAAACTGTTCCACCAGCCCCAGCTGCTTCTGCTGCTCCAGAAAAGCCATTGGCTGGTAAGAAGGCTAAGAAGCCAGCTAAGGCTGCTGCTGCAAGTAAAAAGAAGCCTGCCGGTCCATCTGTCTCCGAATTGATTGTTCAAGCTGCTTCATCCTCCAAGGAAAGAGGTGGTGTTTCTTTAGCCGCCCTAAAGAAGGCTTTGGCTGCCGCTGGTTACGACGTCGAAAAGAATAACTCCAGAATCAAGTTGGGTATCAAGTCTTTGGTTTCCAAGGGTACTTTGGTCCAAACCAAGGGTACCGGCGCTTCTGGTTCTTTCAAGTTGAACAAGAAGGCTTCTTCTGTTGAAACCAAGCCAGGTGCTAGCAAGGTTGCTACTAAGACAAAGGCCACC…
IDR-107	ATGGCTACCTTGATCTACGTTGACAAGGAAAATGGTGAACCAGGTACTAGAGTTGTTGCTAAGGACGGTTTGAAATTGGGTTCTGGTCCTTCTATCAAGGCTTTGGATGGTAGATCCCAAGTCTCCACCCCAAGATTCGGTAAGACTTTTGATGCTCCACCAGCCTTACCAAAGGCCACCAGAAAGGCTTTAGGCACCGTCAACAGAGCTACTGAAAAATCCGTTAAGACCAAGGGTCCATTGAAGCAAAAGCAACCAAGTTTTTCTGCTAAGAAGATGACTGAAAAGACTGTCAAAGCCAAGTCTTCTGTCCCAGCTTCTGATGACGCTTACCCAGAAATTGAAAAGTTCTTCCCATTCAACCCACTTGACTTCGAATCTTTCGACTTGCCAGAAGAA…
IDR-108	ATGTCTGCCAGAGTCAGATCCCGTTCAAGAGGTAGAGGTGACGGTCAAGAAGCCCCAGATGTTGTCGCTTTCGTTGCTCCAGGTGAATCTCAACAAGAAGAACCACCAACTGACAACCAAGATATCGAGCCAGGTCAAGAAAGAGAAGGTACTCCACCAATTGAAGAAAGAAAGGTTGAAGGTGACTGTCAAGAAATGGACTTGGAAAAAACCAGATCCGAACGTGGTGATGGTTCCGATGTCAAGGAAAAGACTCCTCCAAACCCAAAGCACGCTAAGACCAAGGAAGCTGGTGACGGCCAACCA
IDR-109	ATGAGACGTAGAGGTGAAATTGACATGGCTACTGAAGGTGATGTCGAATTAGAGCTAGAAACCGAAACCTCTGGTCCAGAAAGACCACCAGAAAAGCCAAGAAAGCACGATTCCGGTGCTGCTGATTTAGAAAGAGTTACTGACTACGCTGAAGAAAAAGAAATCCAATCATCCAACTTGGAAACTGCTATGTCTGTCATTGGTGACAGAAGATCCAGAGAACAAAAGGCTAAACAAGAACGTGAAAAGGAATTGGCCAAGGTCACCATCAAGAAGGAAGACTTGGAATTGATCATGACTGAAATGGAAATCTCTAGAGCTGCCGCCGAAAGATCCTTGAGAGAACACATGGGTAACGTTGTTGAAGCTTTGATTGCTTTGACCAAC
IDR-110	ATGGTTAGAACCAAGGCTGATTCCGTTCCAGGTACTTACAGAAAGGTTGTTGCTGCCAGAGCCCCAAGAAAGGTCTTAGGTTCTTCTACTTCTGCTACCAACTCCACCAGTGTTTCCTCACGTAAAGCTGAAAACAAGTACGCCGGTGGTAACCCAGTCTGTGTCAGACCAACTCCTAAATGGCAAAAGGGTATTGGTGAATTCTTCAGATTGTCTCCAAAGGACTCTGAAAAGGAAAACCAAATCCCAGAAGAAGCTGGTTCCTCTGGTTTGGGTAAGGCCAAGAGAAAGGCTTGTCCATTGCAACCAGACCACACTAATGATGAAAAGGAA
IDR-111	GTTGAAGAAAAGAAAACTAGAGCTGCCAGAGAAGGTGACAGAAGAGATAACAGATTGAGAGGTCCAGGTGGTCCTCGTGGCGGTTTGGGTGGTGGTATGAGAGGTCCACCACGTGGTGGTATGGTTCAAAAGCCAGGTTTCGGTGTCGGTAGAGGTTTAGCTCCAAGACAA
IDR-112	ATGGAATCCAACCAATCCAATAACGGTGGTTCTGGTAACGCTGCTTTGAACAGAGGTGGTAGATACGTTCCACCACACTTGCGTGGCGGTGACGGTGGTGCTGCCGCTGCTGCTTCTGCTGGTGGTGATGACAGAAGAGGTGGTGCCGGT
IDR-113	ATGTTGTGTGAAGACCAACACATGTCTGTTGAAAACACTCCACAAAAGGGTTCCGGTTCTTTGAACTCTTCTGCCTCATCCATCTCCATTGATGTCAAGCCAACCATGCAATCTTGGGCTCAAGAAGTTAGAGCTGAATTCGGTCACTCC
IDR-114	GAAGTCAAGTTCGAAAGATTGGTTAAAGAAGAAAAGTTGAAGACTCCATACAAGAGAAGACATTCATTTACCCCTCCATCTAACGAAAACTCCAGATCCAACTCTCCAAACAGTTCCAATTCTTCTGCTAACGGTGACGCCGCTGCTCCAAAGGGTGGTAACAACCCACACTCTAGAAACTCCAAGAAGTCTGGTAACTTCAGAGCCCACAAGGAAGAAAAACGTGTTAGACACAAC
IDR-115	ATGATTAAACGTGAATTGATGAAGGACCCAAGATTAGCCAACGAAGACTGGTCTAGATTCTTGCCAAAGTTCAAGAACAAGAACATCAGTAAGCGTAAACAACCAAAGGTCAAGAAACAAAAGAAGGAATACACTCCATTCCCACCATCTCAACCAGAATCCAAGGTTGACAAGCAATTGGCTTCTGGTGAATACTTTTTGAACCAAGAACAAAAGCAAGCTAAGAGAAACCAAGAAAGAACTGAAAAGCAAAAAGAAGCTGCCAAGAGACAAGATGAAAGAAGAAATAAGGATTTCGTTCCACCTACCGAAGAATCTGCTGCTTCCTCCAGAAAGAAGGAAGATGGTTCCTCTTCTTCCAAAGTCGACGTTAAGGCTTTGAAGGCTAAGCTAATCAAG…
IDR-116	GGTCAACACATGAAGAAGTCTTCCTTGTCTGAATCTTCTTCTGACATGATGGACTTGGATGATGGTGTTGAATCCACTCCTGGTTTAACTGAAACTCACCCAGGTAGATCCGCTGTTGCTCCATTCTTGGGTGCTCAACAACAACAACAACAACCAGTTGCCAGCTCTTTGTCCATGTCTATTGACAAACAATTGCAACATCCATTGCAACAATTAACCCAAACCCAATTGTACCAACAACAACAACAACAACAACAACAACAACAAAACGGTTTCAAGCAACAACAACAACAAACTCAACAACAGCTACAACAACAACAATCTCACACTATCAATGCCTCAGCCGCTGCTGCTACCAGTGGTTCTGGTTCCTCCGGTTTGACCATGAGACACAACAAC…
IDR-117	AAAAAATTCAAGGAAGAAGAAAAGCCAGCTTGGGCCAAGAAGGACATCAGAGACTACTCTGAAGCTGATTTGGAACGTCTATTAGACCAATGGGAAGAAGATGAAGAACCATTGGAAGATGACGAATTGCCAGAACACTTGAGACCTCAACCAAAGTTGGACTTATCCAACTTGGATTCTAAGTCTCCAGAAGACTTGTTGAAGGTTTCCAAGAAGGGT
IDR-118	ATGTCTTCTCCAGACGACTTCGAAACCGCTCCAGCTGAATACGTTGATGCTTTGGACCCATCCATGGTTGTTGTCGATTCAGGTTCTGCTGCTGTCACCGCCCCATCTGACTCCGCCGCCGAAGTCAAGGCTAACCAAAACGAAGAAAACACTGGTGCTACTGCAGCTGAAACTTCTGAAAAGGTTGACCAAACCGAAGTTGAAAAAAAGGACGATGATGACACCACTGAAGTCGGTGTTACCACCACCACACCTTCCATCGCTGATACTGCTGCCACTGCCAATATTGCTTCCACCTCTGGTGCTTCTGTCACTGAACCAACTACCGATGACACTGCTGCTGACGAAAAGAAGGAACAAGTTTCCGGT
IDR-119	TACGACAACTTCAGAGAAGTTGTCGACTCCAGATTGCAAGAAGAATCTCACTCTAACGGTGTTGACAATTCAAACTCCAACTCTGACAACAAAGATTCTATCAGACCAAAGACTGAAATTATCTCTACCAACACTAACGGTGCTACCGAAGATTCCACCTCTGAAAAGGTTATGGTTGATGCTGAACAACAAGCTCGTCTACAAGAACAAGCTCAATTGTTGAGACAACACGTCTCCTCTACTGCCTCCATCACTTCTGGTGGTCACAACGACTTGGTCCAAATTGAACAACCACAAAAGGACACCTCCAACAACAACAATAGTAACGTTAACGACGAAGACAACGATTTATTGACCCAAGATAACAACCCACAAACTGCTGATGAAGGTAACGCTTCT…
IDR-120	CAAAGAGGTTACAAGACTTTCGAAGAGATCCAAAAGGAAGAAGAAGCCAGACAACAACAAGAAGAAGACGAAGCTGTCGACGAAATCAAGCAAGAAATTAAATTCACCAAGCAATCCTCCGTTGCTTCTACCAGAAACACTCTAAAGATGGCTCAAGATGCTGAAAGAGCTGGTATGAACACTTTAGGTATGTTGGGTCACCAATCTGAACAATTGAACAACGTTGAAGGTAACTTGGACTTGATGAAAGTCCAAAACAAGGTTGCCGATGAAAAGGTCGCTGAATTGAAGAAGTTGAATCGT
IDR-121	TCCATTTTGGCTGTCCACGTTTCCAACCCATTCAACTCAAAAAGAAGAAGAAGAGAACGTGAGGAACAATTAAAAAATAGAAAGATCGAAGAAAAGTTGATGAGAGAACAAACTTCTCAACAATTGTCCCAATCCACTCAAAGAATTGAAGGTGCTATGAACGCCAACAATAACATCTCTGAAGTCAGAGAAAGATACCAAAGAAAGAACGTTTTGGAAAAGGCTAAGCGTTACCAATTCGAAAACGACGAAGAAGATGATGAAATGGAATTGGAAATTGACAGAAACTTAGACCAAATCCAACAAGTTTCTAACAGATTGAAGAAGATGGCTTTGACCACCGGTAAGGAACTAGATTCTCAACAAAAGAGATTGAACAACATTGAAGAATCTACTGAT…
IDR-122	ATGTCTCAAGAACAACCAAGAAGACCACAAGCCGGTCAAGACCCAATCAAATACGGTGATGTTTTGCCAGTCTCTGGTGACTTGTCCCAAAAGCCAATTACTCCAGAAGATGCTGCTATGATGCAATCTGCTGAATCCCGTGTCTTAGGCCAAACTCAACCTGGTGGTGTTGCTTCTGTTATGCAATCCGCCGCTACCAGAAACGAACAAGCTGGTATTGTCGGTCACAAGGACGTTACCGATGTCACCGGTGACAGAGGTGTCACTGTTACTGAAACCCAAGTTCCAGGTAGAAGAATC
IDR-123	ATTACTGAAACCGTCGGTGGTCAAGTTGTTGGTCAATTCGTCGAACCAACCCCAGTCCAAGTCGGCTTAACTGGTGCTGTCAGAGAATCTGCTTTGACCATTGGTGAAGCCTTGGAAGCTACTGCTCACACTGTTGGTGACAAACCAGTTGAACAATCCGATGCTTCAGCCATCCAAGCTGCTGAAGTTCGTGCTACCGGTTCTAACGTTATCACTCCAGGTGGTTTGGCTTCCATGGCTCAATCTGCCGCCGCTTTCAACGCTGAATGTCAAAGAGAAGAAGAAAAGATCAAGATGGGT
IDR-124	ATGGCTTCTCACCAAGAACAATCCTACAAGGCCGGTGAAACTAGAGGTAAGGCTCAAGAAAAGACTGGTGAAGCTATGGGTACCATGGGTGACAAGACCCAAGCTGCCAAGGACAAGACTCAAGAAACTGCACAATCAGCCCAACAAAAGGCTCACGAAACTGCCCAATCTGCTAAGGATAAAACTTCTCAAGCTGCTCAAACTACTCAAGAAAGAGCCCAAGAATCCAAGGACAAAACTGGTTCTTACATGTCTGAAACCGGCGAGGCCATCAAGAACAAGGCTCATGATGCTGCTGAATACACCAAGGAAACCGCTGAAGCTGGTAAGGAAAAGACCTCTGGTATTTTAGGTCAAACCGGTGAACAAGTTAAGCAAATGGCCATGGGTGCTACTGAC…
IDR-125	TGGGAAGCTGAAGAAAACGTTCCATACACTGCTTACTTCGACAAGGCTAGAAAGACCAGAGCCCCAGGTTCCAAAATCATGAACCCAAACGACCCAGAATACAACTCTGATTCCCAATCTCAAGCTCCACCTCACCCACCATCTTCACGTACCAAGCCAGAACAAGTTGACACTGTCAGAAGATCCAGAGAACACATGAGATCCAGAGAAGAATCTGAATTGAAGCAATTCGGTGATGCTGGTGGTTCTTCCAATGAAGCCGCTAACAAGAGACAAGGTAGAGCTTCTCAAAACAACTCC
IDR-126	CGTGACAACTCTGGTGTCACTTTGGAAGGTCCAAAGGATTTGCCACCTCAATTGGAATCCAACCAAGGTGCTAGAGGTTCCGGTTCAGCCAACTCCGTTGGTTCTTCTACCACCAGACCAAAGTCTCCATGGATGCCATTCCCAACTTTA
IDR-127	ATGGCTTCTTACCAAAACAGACCAGGTGGTCAAGCCACCGATGAATACGGTAACCCAATCCAACAACAATACGACGAATACGGTAACCCAATGGGTGGTGGTGGTTATGGTACTGGTGGTGGTGGTGGTGCTACCGGCGGCCAAGGTTACGGTACCGGTGGTCAAGGTTACGGTTCAGGTGGTCAAGGTTACGGTACCGGTGGTCAAGGTTACGGTACTGGTACTGGTACTGAAGGTTTCGGTACCGGTGGTGGTGCCCGTCATCACGGTCAAGAACAATTGCACAAGGAATCTGGTGGCGGTTTGGGTGGTATGTTGCACAGATCCGGTTCCGGTTCTTCCTCCAGTTCTGAAGATGACGGTCAAGGTGGTAGAAGAAAGAAGGGTATTACTCAAAAG…
IDR-128	ATGGCTGAAGAATACAAGAACAACGTTCCAGAACACGAAACTCCAACTGTTGCCACTGAAGAATCTCCAGCTACCACCACTGAAGTCACTGACAGAGGTTTGTTTGATTTCTTGGGTAAGAAGGAAGAAGAAGTCAAGCCACAAGAAACCACAACCCTAGAATCCGAATTCGACCACAAGGCTCAAATCTCTGAACCAGAATTAGCCGCTGAACATGAGGAAGTTAAAGAAAACAAGATTACTTTGTTGGAAGAATTGCAAGAAAAGACCGAAGAAGATGAAGAAAATAAACCTTCCGTC
IDR-129	ATTGAAAAGTTGCACAGATCCAACTCTTCCTCCTCATCCTCTTCTGACGAAGAAGGTGAAGAAAAGAAAGAAAAGAAGAAGAAGATTGTCGAAGGTGAAGAAGACAAAAAGGGTTTGGTTGAAAAGATCAAGGAAAAATTGCCAGGTCATCATGACAAGACTGCTGAAGATGATGTCCCTGTTTCCACCACTATCCCAGTTCCAGTCTCTGAATCTGTTGTTGAACACGACCACCCAGAAGAAGAAAAGAAGGGTTTAGTCGAGAAGATCAAGGAAAAGTTGCCAGGTCACCACGATGAA
IDR-130	AAGGCTGAAGACTCTCCAGCTGTCACTTCCACTCCATTGGTTGTTACTGAACATCCTGTCGAACCAACCACTGAATTGCCAGTTGAACACCCAGAAGAAAAGAAGGGTATTTTGGAAAAGATCAAGGAAAAATTACCAGGTTACCACGCCAAGACCACCGAAGAAGAAGTCAAGAAAGAAAAGGAATCTGATGAC
IDR-131	ACTGCTGGTGAAAAGGAAGACGCCCCAAGACGTGAAAGAAAGCCAAGACCAACCACTCCAAGAAGAAAGGAAGGTGCTGAACGTAAACCAAGAGCCCAAAAGCCAGTTGAAAAGGCTCCAAAGACCGTCAAGGCCCCTAGAGAAGAACAA
IDR-132	AGACAATTGGCTTTGGAAGCTAAGGGTGAAACTCCATCTGCTGTCACCAGATTATCCGTTGTCGCCAAATCTGAACCACAAGATGAACAATCCCGTTCTCAATCTCCAAGAAGAATCATTTTGTCCAGATTGAAGGCTGGTGAAGTTGAC
IDR-133	TACAACGGTCAATCTGAAACCTCTCAACAACCAGAAACTCCTGTTTTCAACACTTTGCCAATGATGGGTAAGGCTTCTCCAGTCTCCCTAGGTGTTCCATCTGAAGCTACTGCTAACAACGGTCAACAACAACAAGTTCAAGAACAAAGAAGACGTATTAATGCTATGTTGCAAGACTACGAATTGCAAAGAAGATTGCACTCCGAACAATTACAATTCGAACAAGCTCAAACTCAACAAGCCGCCGTCCAAGTCCCAGGTATCCAAACCTTGGGTACCCAATCCCAG
IDR-134	AAGAAGGCTATGTCCGATGACGAACCAAAGCAAGACAAAACTTCTCAAGATGCTGATTTCACTGCTAAGACCATCGCCGATAAACAAGCTGACACCAACCAAGAACAAGCCAAGACTGAAGACGCTAAGAGACACGACAAGGAACAAGTT
IDR-135	ATGGTTTACAAGCACGCTATCTCCACCGTCGTTCCATCCAGACCAGTCTCCCACCACTCTAACAATGCTGGTGGTGGTACCTCATCCAACTACCATCACGGTTCTTCTGCCCAAAACACTTCTGCTCAACAAGACTCTGAAGAAACTGAA
IDR-136	AGAGCTTTGGGTATGTCCATGAGAGTTGAACGTTCTTCTTTGGAACAAGTCCAAGAAAGATTCGAAGTCTTAAAAAAGCGTAAGGCCCCAGGTACTTTCACCGAACAAGATTTGGACGAAAGAATCAGAAAGCAACAAGAAGAAGAAGAAGAATTGAAGAGACAAAGAAGAGAAAAGAAGAAGGAAAAGAAGAAGGGTAAGGTTGTCGAAGAGGAACCAGAAATGGACCCAGAAGTTGCTGAAATGATGGGTTTCGGTGGTTTTGGTTCTTCCAAGAAATCA
IDR-137	AACAAGCCAGAAAAGGATGCTGAAATGGACACTGATTCTTCCACTCCAGTTGTTAAGACCAAGGTTAGAGGTAAGAAGGTCAAGAGAAGATACAAGGAAGAAAAAGAAGAAATTGCTGGTTCCATCAGATGGTTAGCTGAAGTCGTCATGAGATCCGAAAGAGCCAGAATGGAAACCATGAAAGAGATTGAACGTATGAGAGCTGAAGCCGAAGCTAAGAGAGGTGAATTGGACTTGAAGCGTACTGAAATCATGGCTAACACC
IDR-138	AGAAAGTTATTGGGTGAAGGTATTGATGCTTGTTCTATTGAAGAATTGCAACAATTGGAAAACCAATTGGACAGATCCTTGTCCCGTATCAGAGCCAAGAAGTACCAATTACTAAGAGAAGAAATCGAAAAGTTGAAGGCTGAAGAAAGAAACTTGGTTAAGGAAAACAAA
IDR-139	CTATCAGAATTATGGAACATTGACCCAAAGAGAGCTAAGAGAATCTTGGCCAACAGACAATCCGCTGCCAGATCCAAGGAAAGAAAGGCTAGATACATCCAAGAATTGGAACGTAAGGTCCAATCTTTGCAAACTGAAGCTACCACTTTGTCTGCTCAATTGACCTTGTACCAAAGAGATACCAACGGTTTGGCTAATGAAAACACTGAATTGAAGTTGAGATTGCAAGCTATGGAACAACAAGCTCAATTAAGAAACGCTTTGAACGAAGCCTTACGTAAAGAAGTTGAAAGAATGAAGATGGAAACTGGTGAAATTTCTGGTAACTCCGATTCTTTCGACATG
IDR-140	AACACTTTGAAGGACATCTTAGAAGAATTCATGAGACAAACCGTTAAGATGGAAAAGGAATGGAGAGACGCTTGGGAAATGAAGGAAATTGAACGTGAAAAGCGTGAGAAAGAATGGAGAAGAAGAATGGCTGAATTGGAAGAAGAAAGAGCCGCCACTGAACGTAGATGGATGGAAAGAGAAGAAGAAAGAAGATTGAGAGAAGAAGCTAGAGCCCAAAAGAGAGATTCTTTGATCGATGCTTTGCTA
IDR-141	TCAGAAGGTGGTGGCGGTGGTACTTCTGGTGCTGCTAGAAAGAGAGAATACTCTTCTGATGAAGAAGAAGAAAACGTTAACGAAGAATTGGTTGACGTCTCCAATGACCCAAAGATTTTGAACCCAAAGAAGAACATTGCTAAGAAACGTAAGGGTGGTTCTAACTCCTCCAACTCTAACAACGGTGTTAGAGAAGTCTTGGAAGAATTCATGAGACACCAAGTCAGAATGGAATCTGAATGGCGTGAAGGTTGGGAAGCCAGAGAAAAAGAACGTGCTGAAAAGGAAGAAGAATGGAGAAGAAAGATGGAAGAATTAGAAAAGGAAAGATTGGCTATGGAAAGAATGTGGAGAGATCGTGAGGAACAAAGAAGATCCAGAGAAGAAATGAGAGCTGAA…
IDR-142	CCATTCAGAGATGAATTGCACATCAACGAAGACATGGACATGCACGAATCCGCCAAGTTGGAAAGACAAAGAAGAGAAGAAGCCAGACGTTCTTTGAGATCCGGTTTGACCGGTTTACCTCAACCAAAGAACGAATACCAAATTGTCGCTCAACCACCTCCAGAAGAATCTGAAGAACCAGAAGAAAAGATCGAAGAAGATATGTCTGACAGAATTGCCCGTGAAAAAGCTGAAGAGGAAGCTCGTCAACAAGCTTTGTTGAAGAAGAGATCCAAGGTCTTGCAAAGAGACTTGCCAAGACCACCAGCTGCTTCTTTGGCTGTCATCAGAAACTCCTTATTGTCTGCTGATGGTGATAAATCATCCGTTGTTCCACCAACTCCAATTGAAGTTGCTGAC…
IDR-143	ATGGCTGACAGAGTCAAGGGTCCATGGTCTCAAGAAGAAGATGAACAATTGAGAAGAATGGTTGAAAAGTACGGTCCAAGAAACTGGTCAGCCATTTCCAAATCCATCCCAGGTAGATCCGGTAAGTCTTGTCGTTTGAGATGGTGTAAC
IDR-144	GTTGAAAAATTGACTGAAGAAAACAGAAGATTGGAAAAGGAAGCTGCTGAATTGAGAGCTTTGAAGTTGTCCCCAAGATTATACGGTCAAATGTCTCCACCTACCACTTTGTTGATGTGTCCATCTTGTGAACGTGTTGCCGGTCCATCCTCTTCCAACCACAACCAAAGATCCGTTTCACTA
IDR-145	ACCCCAGAAGAAGTCAAGTTGAAGGCTCAAGAATTAAGAGAAAGAGCTAGAAAGAAGAAAGAAGAAGAAGAAAAGAGAATGGAACGTGAGCGTGAAAAGGAAAGAATCAGAATTGGTAAGGAATTGTTGGAAGCTAAGCGTATGGAAGAAGTTAACGAAAGAAAGAGATTGATGTTCTTGAGAAAGGCCGAAAAGGAAGAAGAAAAAAGAGCCAGAGAAAAGATCAGACAAAAGCTAGAAGAAGACAAGGCTGAAAGAAGAAGAAAATTGGGTTTGCCACCTGAAGATCCAGCTACTGCTGCTGCCAAGCCATCTGTT
IDR-146	CCATTGCAAGAAATTTTCGGTGTTACTAAGAACAACGACCACGAAAAGCACGATGAAGAACCAGACGAAGAATCTTACAGAATGGCTAAAAGACAAAGATCCATGGAATACCGTATGATGATGGAAAAGAAGAGAAGAAAGGAAATCAAGGACAAGGTCGATATCTTG
IDR-147	AAAAGAAAGTTGTCCATCCCAATGACTGTTGCCAGAGTTGTCAAGTACATTCCAGAACAAAAGCAAGAATTGCAAAGATTGTCTAGAAGAAAGGAAGAATTATTGAAGAGAATCTCTCGTAAGACCCACCAAGAACAATTGAGAAACAAGGCTATGATGGACTCCATTGAT
IDR-148	TACACTTCTGTCTACAACAACTCTTTGGAAGCTGAACCATCTTCCAACAATGACCAAGATGAAGACAGAATCAACGATAAGATGAAGAGAAGATTAGCTCAAAACAGAGAAGCCGCTAGAAAATCCCGTTTGAGAAAGAAGGCTCACGTTCAACAACTAGAAGAATCCAGATTGAAGTTGTCTCAATTGGAACAAGAATTGGTT
IDR-149	TTGCAAGTTGTCGATTCCAGAATGGAAGAGGAAGAAGTTGACGCTGCTGAAACTATTGAAGAAGAAGAACAAAGAGAACAAAGATCCTACAAGGAAAAGGTTGAAATCTTAAAACGTAAAAAGATGGAATTGAAGGCTGCCAGATTGGCTAAGAGATCCAAGACCTCTGAAGGTTCCGTCAAGAAGCCAAAGAAGACTGAAGAAGAATCTCCATCTGATGAAGAAGATGACGAAGACTCAGCCGTCGACTGGAGA
IDR-150	ATGATGTTGACTAAATCCGTTGTTATCTCTCGTCCAGCTGTCAGACCAGTTTCCACCAGAAGAGCCGTTGTCGTTAGAGCTTCTGGTCAACCAGCTGTTGACTTGAACAAGAAGGTCCAAGATGCCGTCAAGGAAGCTGAAGATGCTTGTGCCAAGGGTACTTCTGCTGACTGTGCTGTC
IDR-151	ATGGCTACCATTGCCACTGGTTTGAACATTGCTACTCAAAGAGTTTTCGTTACCTCTGAAAACAGACCAGTCTGTTTGGCTGGTCCAGTTCACCTAAACAACTCTTGGAACTTGGGTTCCAGAACCACTAACAGAATGATGAAGTTGCAACCAATCAAAGCCGCTCCAGAAGGTGGTATCTCTGATGTCGTTGAAAAGTCAATCAAGGAAGCTCAAGAAACTTGTGCTGGTGACCCTGTCTCTGGTGAATGCGTTGCCGCTTGGGATGAAGTCGAAGAATTATCCGCCGCTGCTTCCCACGCTAGAGACAAGAAGAAGGCTGACGGTTCTGACCCATTGGAAGAATACTGTAAGGACAACCCAGAAACCAACGAATGTCGTACTTACGATAAT
IDR-152	ATGTCTGACCAATCTCAAGAACCAACCATGGAAGAAATTTTGGCTTCCATCCGTAGAATCATCTCTGAAGATGATGCTCCAGCCGAACCAGCTGCTGAAGCTGCTCCACCTCCACCTCCAGAACCTGAGCCAGAACCAGTTTCTTTCGATGACGAAGTCCTAGAATTAACTGACCCAATTGCTCCAGAACCAGAATTGCCACCATTGGAAACCGTCGGTGACATTGACGTTTACTCTCCACCAGAACCAGAATCCGAACCAGCTTACACTCCACCACCAGCTGCCCCAGTCTTTGACAGAGATGAAGTTGCTGAACAATTGGTTGGTGTTTCCGCCGCCTCCGCTGCCGCTTCTGCTTTCGGTTCTTTGTCCTCAGCTTTGTTGATGCCAAAGGATGGT
IDR-153	TGTTTGAGAAAGAAGAGAAAGCCACAAGCTGAAAAGGTCGATGTTATTGCTGGTTCTTCCAAGATGAAGGGTTTCAGTTCTTCTGAATCTGAATCCTCAAGCGAATCTTCCTCCTCTGACTCCGAAGATTCTGAAACCGAAATGGCTCCAAAGTCTAAGAAGAAAGGTCACCCAGGTAGAGAACAAAAGAAGCACCACCATCATCACCACCAACAAATGCAACAAGCTCCAGCCCCAGTTCCACAACAACCACCACCACCACCTCAACAACCACCCCCACCTCCACCACCACAACAACAACAACAACCACCTCCACCGCCACCACCACCATCCATGCCACAACAAGCCGCTCCAGCTATGAAATCTTCTCCACCACCATTCATCGCCACTCAAGTCCCA…
IDR-154	TCCAACAGAGCTGCTGCCTTGCCACCAAAGCCAGCTCGTCCACCAGCTGTCTCTCCAGCTTTGACTCAAACTCCATTGTTGCCACAACCACCAATGGCTCAACCACCTCAAGTCTTGTTGGAAGATGAAGAACCACCAGCCCCACCATTGACCTCCATGCAAATGCAATTGTACTTGCAACAATTGCAAAAGGTCCAACCACCAACCCCATTATTGCCATCCGTTAAGGTTCAATCTCAACCACCACCTCCATTACCACCACCTCCACATCCATCTGTTCAACAACAATTACAACAACAACCCCCACCACCTCCACCACCTCAACCACAGCCACCACCACAACAACAACACCAACCACCACCAAGACCAGTTCACCTACAACCAATGCAATTCTCTACT…
IDR-155	TCTCAATTCCAATCCTTGACCCACCAAAGTCCACCTCAACAAAACGTTCAACCAAAGAAGCAGGAGTTGAGAGCTGCTTCCGTTGTTCAACCACAACCATTGGTTGTTGTCAAGGAAGAAAAGATTCACTCTCCAATCATCAGATCCGAACCATTTTCCCCATCACTACGTCCTGAACCACCTAAGCACCCAGAATCCATTAAAGCCCCAGTCCACTTGCCACAAAGACCAGAAATGAAGCCAGTCGATGTCGGTAGACCAGTTATTAGACCACCAGAACAAAACGCCCCACCACCAGGTGCTCCAGACAAGGACAAACAAAAGCAAGAACCAAAGACTCCAGTTGCTCCAAAGAAGGATTTGAAGATCAAGAACATGGGTTCTTGGGCTTCTTTGGTC…
IDR-156	AGAGCCCACGAAGAAGCCAGAAGAAGACAAGAACAACAACAACAACAAAGACAAGAACAACAACAACAACAACAGCAACAAGCCGCTGCTGTTGCTGCCGCCGCTACTCCACAAGCTCAATCTTCTCAACCACAATCCATGTTGGACCAACAAAGAGAATTGGCTAGAAAGAGAGAACAAGAAAGAAGACGTCGTGAAGCTATGGCTGCTACCATCGATATGAACTTCCAATCC
IDR-157	GAACACCACTCTGGTTCCCAAGGTCCATTGTTGACCACCGGTGACTTGGGTAAGGAAAAGACTCAAAAGAGAGTCAAAGAAGGTAACGGTACTTCTAATTCTACATTAAGCGGTCCAGGTTTGGATTCAAAACCAGGTAAGCGTTCTAGAACTCCATCCAACGATGGTAAGTCCAAGGACAAGCCACCAAAGAGAAAGAAGGCTGACACTGAAGGTAAATCCCCATCTCATTCCTCTAGTAACAGACCATTCACCCCTCCAACCTCCACTGGTGGTTCTAAGTCTCCAGGCTCTGCTGGTAGATCCCAAACTCCACCTGGTGTTGCCACCCCACCAATTCCAAAGATTACCATCCAAATC
IDR-158	CCAAAGGGTACCGTCATGGTTGGTAAACCATCTTCCCACTCTCAATACACTTCTTCTGGTTCTGTCTCCTCCTCTGGTTCCAAGTCTCACCACTCCCATTCTAGTTCTTCTTCTAGCTCTGCCTCCACCTCTGGTAAGATGAAGTCTTCTAAGTCTGAAGGTTCATCATCGAGTAAATTGTCTTCCTCCATGTACTCTTCTCAAGGTAGCTCCGGTTCCTCCCAATCCAAGAACTCCTCTCAATCTGGTGGTAAGCCAGGTTCCTCTCCAATCACTAAGCACGGTTTATCTTCTGGCTCTTCTTCTACCAAGATGAAGCCACAAGGTAAGCCTTCCTCTTTGATGAACCCATCTCTATCCAAGCCAAACATCTCTCCATCTCATTCCAGACCACCAGGT…
IDR-159	GCTTCTTCCTCTTCTTTCTCTTCAAGTGGCTCTTCCATGTCTTCCTCTCAAAACCAACACGGTTCCTCCAAGGGTAAATCTCCATCCAGAAACAAGAAGCCATCTTTAACTGCTGTCATTGACAAGTTGAAGCATGGTGTTGTTACCTCTGGTCCAGGTGGTGAAGACCCATTGGACGGTCAAATGGGTGTTTCTACCAATTCATCCTCTCACCCAATGTCCTCCAAGCACAACATGTCTGGTGGTGAATTCCAAGGTAAGAGAGAAAAGTCTGACAAGGATAAATCCAAGGTCTCCACCTCCGGTTCTTCTGTCGATTCTAGCAAAAAGACTTCTGAATCTAAGAACGTTGGTTCCACTGGTGTCGCCAAGATCATCATTTCTAAGCACGATGGTGGT…
IDR-160	AAACCAGGTGAATCCTCTGGTGAAGGTTTGAGACCTCAAATGGCCTCATCCAAGAACTACGGTTCTCCATTGATTTCCGGTTCTACCCCAAAGCACGAAAGAGGTTCCCCTTCCCACTCTAAGTCTCCAGCTTATACTCCACAAAACTTGGACTCTGAATCCGAATCTGGTAGCTCCATTGCTGAAAAATCTTACCAAAATAGTCCATCTTCCGATGATGGTATCAGACCATTGCCAGAATACTCTACTGAAAAGCATAAGAAGCACAAGAAGGAAAAGAAAAAGGTTAAGGACAAGGATCGTGATAGAGATAGAGACAAAGATCGTGACAAGAAGAAGTCTCACTCCATCAAGCCAGAATCTTGGTCTAAGTCCCCAATCTCTTCTGACCAATCTTTG…
IDR-161	ACCAAGGGTACTGATGAAGTCCCAGTTCCACCTCCAGTTCCACCAAGAAGAAGACCAGAATCTGCTCCAGCTGAATCCTCTCCATCTAAAATCATGTCTAAGCACTTAGACTCTCCACCAGCCATTCCACCAAGACAACCAACTTCCAAGGCTTACTCTCCACGTTACTCCATTTCCGACAGAACCTCCATCTCTGACCCACCAGAATCACCACCTTTGTTGCCACCAAGAGAACCAGTCAGAACTCCAGATGTTTTCTCTTCTAGTCCATTGCACTTGCAACCACCTCCATTGGGTAAG
IDR-162	AAAGTCTTGCAAACTAGAATGGCTCGTTTAATCGTTGAACACTCTTCTACCGAAGGTAAGTTGATGAAGAGAATTGAAATGTTGGAAAAGCATCTATCCCGTTACAAGGCTTTGGCCAGAAGACAAAAGACCATGCACGGTGTTTCCATCGATGGTGGTGACATCTCTACTGACGGTGTCGATGAAAGAGTTAGACCACCAAGATTGAGACAAACCAAGACTATTGACTTGCCAACCGGTACTGAATCTGAATCCTTATTGAAG
IDR-163	GAAGTCGACATGAGACCATCTCCAAAGTTGGCTGAAGAAGCTAGAAGAGATGCTGAACGTTACCAAAAGGAACATGAAATGATCAACAGACAAGCTGAAGCTACTTTGCAAAAGAAGGCTGAAGAATACAGACACCAAACTGAAGCCGAGGCCGAAAAGATCAGACGTGAACTAGAAAAACAACACGAAAGAGATATCCAATTCAGAAAGGATTTGATTGACCAAACCATTGAAAAGCAAAAAAGAGAAGTTGACTTGGAAGCCAAGATGGCTAAGAGAGAATTGGACAGAGAAGCTCAATTA
IDR-164	ATGGCTTCTCACGGTCAATCTTACAGAGCTGGTGAAGCTACCGGCCGTGCTGAAGAAAAGGCTGACCAAATGATGGGTAAGACCAGAGGTGCTACTGAGGCTATGAAGAACAAGGCTCAACAAGCCAAGGACAAGACCATGGAAACTGCTCAAGCTGCCAAGGAAAAAACATCTGAAAAGGCATATGAAGCTAAGGACAAGACTTCCAACATGGCTCAATCTGCTAAGGGTCAAGCTCAACAATCCAAGGATCAAACTGGTTCTTTCGCTTCCGACAAAGCCCAAGCTGCTAAGGATAAAGCTTACCAAGCTGCTCAAGCCACCAAGGAAAAGGCCTCAGACATGACTGAATACGCTAAAGAAACCGCTGAAGCCGGTAAGGAAAAGACTGGTGGTATT…
IDR-165	ATGGAAAAATCCAAGAAGGAACAAATGAAGGAATTAGAAAAGATGCGTGCCGATTTCCAAAGAGACTTGGAATTGCAAAAGAAGCAAATCGTTGACAGAGCCCAATCCGAAATTGCTAGATTGAGAGAAGAAGAAGAAAACCACCACGGTGGTGGTGACGATGACGAATCTGAAGATGAAGAAATGGAAAACGACTCTGATGTCAACTTGTCTGACGAG
IDR-166	GCTCGTATCGGTTCCGATCCATTGGCTTACGAACCAAAAGAAGACTTGCCAGTCATCACTATTGACCCAGCCTCTCCACAATCTCCTGAATCTGTCGACTTGGTTAACGAAGAACTAAAGGGTAAGGTTTTGGGTTTATCCAGAGATCCTGCCAAGGTCGCTGAAGAAGATGAAGATGACGACGGTGGTATTATGATGAGATCCAAGGAAACCTCTTCCCCAGGTACTGATGACGTTTTTACCCCAGCTCCAAGCGACTCACCATCTTCTCAAAGAATCCAAAGATGTTTGTCTGACCCAGGTCCACACCCAGAACCAGGTGAAGGTGAACCATTCTTCCCAAAGGGTCAA
IDR-167	TGTTCCGTTACCGAATTGCAAGAAATTGACACTCAAATCGAAAAATCTTTGAGAATCGTCAGATCCAGAAAGGCTGAATTATACGCCGATCAATTGAAGAAGTTGAAAGAAAAGGAAAGAGAACTATTGAACGAAAGAAAGAGATTGTTGGAAGAAGTCAACATGCATCACTCCTCCAAGGGTAACACTGAAGGTGGTCACAGAACCAAGCACTCTTCTGAAGTTGAA
IDR-168	GCCCGTTTACACGAAGCTTTGTCTCAAATGTGGCAATTGGAAGCCGCTTCCAGAGCTGCTATTGAAAACGGTTCTGAAGAAGGTTTGGGTGACTCCGCTGAAGTTGAAGAAGCTCCAATCGAATTCCCAAGAGATATCACCATGGAAGAAACTGAACCAACTAGATTGAACCCAAACAGA
IDR-169	TTACGTTCCAGAGACAACATCTACGAATACAGAGATTCTCCATCCACCAAGACTTTGGCCTCCAAGGCTCACACTGACACCACCTCCTTGAGATCCCCATCTTCTTTGGCTATGACTCAAAAGTCTTCCTCTCAAGCTTCTTTGAAATCA
IDR-170	TACAGAGGTTCTTCTTTCTTGGACCCAAAGGGTCGTGGTGGTTCCACCGGTTACGACAACGCCGTTGCTTTGCCAGCTGGTGGTAGAGGTGATGAAGAAGAATTAGTCAAGGAAAACGTTAAAAACACTGCTGCTTCCGTCGGTGAAATC
IDR-171	ACTTCTGGTCAAGCTGAATCTTCAAGTGGTAACGAAGGTGCTGCTCCAGCTAAGGGTCGTGGTAGAGGTAGACCACCAGCTGCCGCCAAGGGTGTTGCTAAGGGTGCTGCAAAAGGTGCCGCTGCTTCTAAGGGCGCCAAGTCTGGTGCTGAATCCTCCAAGGGTGGTGAACAATCTTCCGGTGACATCGAAATGGCTGATGCTTCCTCT
IDR-172	AAGGGTGGTTCTGACCAAAGAGATAGTGCCGCCACCGTTGGTGAAGGTGGTGCTTCCGGTTCTGAAGGTGGTGCTAAGAAGGGTCGTGGTAGAGGTGCCGGTAAGAAAGCTGATGCTGGTGACACTTCTGCTGAACCACCAAGAAGATCCTCTAGATTGACCTCTTCTGGTACCGGTGCCGGTTCCGCTCCAGCTGCTGCAAAAGGAGGCGCCAAGAGAGCTGCTTCTTCATCCTCCACTCCATCTAACGCTAAGAAGCAAGCTACTGGTGGTGCTGGTAAGGCCGCTGCTACCAAGGCTACTGCTGCCAAGTCTGCTGCCTCCAAGGCTCCTCAAAACGGTGCTGGTGCTAAGAAGAAGGGTGGTAAGGCTGGTGGTAGAAAGCGTAAA
IDR-173	ATGTCTGATGCCGGTAGAAAGGGTTTCGGTGAAAAGGCTTCTGAAGCTTTGAAGCCAGACTCTCAAAAGTCATACGCTGAACAAGGTAAGGAATATATCACTGACAAAGCCGATAAAGTTGCTGGTAAGGTCCAACCAGAAGATAACAAGGGTGTTTTCCAAGGTGTCCACGATTCTGCTGAAAAAGGCAAGGACAACGCCGAAGGTCAAGGTGAATCCTTAGCTGACCAAGCTCGTGACTACATGGGTGCTGCTAAGTCCAAGTTGAACGATGCTGTCGAATACGTTTCCGGTAGAGTTCACGGTGAAGAAGACCCAACCAAGAAG
IDR-174	TTGGTCTCCACTTTGGGTGAAAAATCTGGCAAGGGTTTGAAGACCTGTAAGTCTCCAGGTCGTAAATCCAAGGAAAGCTCTCCAAAGGGTAGATCCTCTTCTGCTTCTTCCCCACCAAAGAAGGAACACCACCACCATCATCACCACTCTGAATCTCCAAAGGCTCCAGTTCCATTGTTGCCACCATTACCACCTCCACCTCCAGAACCAGAATCCTCCGAAGACCCAACCTCTCCACCAGAACCACAAGACTTGAGTTCATCTGTCTGTAAGGAAGAAAAGATGCCAAGAGGTGGTTCTTTGGAATCTGATGGTTGTCCAAAAGAGCCAGCCAAGACTCAACCAGCTGTTGCTACCGCCGCTACTGCTGCTGAAAAGTACAAGCACAGAGGTGAAGGT…
IDR-175	CATCAGCAACAACAATTGCAACAACAACAACACCACTTACAACAACAACAACATCAACAACAACAACAATCTTTGTCCCAGCAACCACAACAACAACAATCACAACAATCCCAAGCTCACTCTCAACAACACCAACAACAACACCAACAACAACAACAACAACAACAACCACAACAACAACAACCTCAACAACACCCACCACAACAACCACAACAACAAAACTCTCAACAAGCCATCGTCGGTCAATCCCAACAACAAGTTACTTCTGGTCAACAAAAG
IDR-176	ATGGAAGAATTGTCCTCCGTTGGTGAACAAGTTTTCGCCGCTGAATGTATCTTGTCTAAGAGATTGAGAAAGGGTAAGTTGGAATACTTGGTCAAGTGGAGAGGTTGGTCTTCCAAGCACAACTCTTGGGAACCAGAAGAAAACATTTTGGACCCAAGATTATTATTGGCTTTCCAAAAGAAGGAACACGAAAAGGAAGTCCAAAACAGAAAACGTGGTAAGAGACCAAGAGGTAGACCACGTAAACTAACTGCTATGTCTTCTTGTTCA
IDR-177	AAGGTTAGAACCCAAAAAGGTGAATTGGGTATGTCTCCACCTGGTTCCAAGATCCCAAAGGCCCCATCCGGTGGTGCTGTTGAACAAAAGGTCGGTAACACTGGTGGTCCACCACATACTCACGGTGCTTCCAGAGTTCCAGCCGGTTGTCCAGGTCCACAACCAGCCCCAACTCAAGAATTAAGTTTGCAAGTTTTGGACTTGCAATCTGTCAAGAACGGTATGCCAGGTGTTGGTCTATTAGCCAGACACGCTACTGCTACCAAGGGTGTCCCAGCTACCAACCCAGCTCCAGGTAAGGGTACCGGTTCTGGTTTGATTGGTGCCTCAGGCGCCACCATGCCAACTGATACTTCTAAATCTGAAAAGTTGGCTTCTAGAGCTGTCGCTCCACCAACC…
IDR-178	AGAGGTGGTGGTTTCGGTGGTCGTGGTGGTTTTGGTGACAGAGGTGGTAGAGGTGGTCGTGGTGGTTTCGGTGGTGGCCGTGGTAGAGGAGGCGGTTTCAGAGGTAGAGGTAGAGGTGGTGGTGGTGGTGGTGGTGGTGGTGGTGGTGGTGGTAGAGGTGGTGGTGGTTTCCACTCTGGTGGTAACAGAGGTAGAGGTAGAGGTGGTAAGAGAGGTAAC
IDR-179	GAGGAAGATGCTGAATCCGAAGACGAAGAAGAAGAAGATGTTAAGTTGTTGTCCATTAGTGGTAAGAGATCCGCTCCAGGTGGTGGTTCCAAGGTTCCACAAAAGAAGGTCAAATTAGCCGCTGACGAAGACGACGATGATGACGATGAAGAAGATGACGACGAAGACGACGATGACGATGACTTCGATGATGAAGAAGCTGAAGAAAAGGCTCCAGTCAAGAAATCCATCCGTGACACTCCAGCTAAGAACGCTCAAAAGTCTAACCAAAACGGTAAGGACTCTAAGCCATCTTCTACCCCAAGATCAAAAGGTCAAGAATCTTTCAAGAAGCAAGAAAAGACCCCTAAGACTCCAAAGGGT
IDR-180	ATGGACCCAGGTCAACAACCTCCACCTCAACCAGCTCCACAAGGTCAAGGTCAACCACCATCTCAACCACCTCAAGGTCAAGGTCCACCATCCGGTCCAGGTCAGCCAGCTCCAGCTGCTACCCAAGCTGCTCCACAAGCCCCACCAGCCGGTCACCAAATCGTCCATGTCAGAGGTGACTCTGAAACTGACTTGGAAGCTTTATTCAACGCTGTTATGAATCCAAAGACTGCTAACGTTCCACAAACCGTCCCAATGAGACTAAGAAAGTTGCCAGATTCTTTCTTCAAGCCACCAGAACCAAAATCTCACTCCAGACAAGCCTCCACTGATGCTGGTACCGCCGGTGCCTTAACCCCACAACACGTTCGTGCTCACTCTTCCCCAGCTTCTTTGCAA…
IDR-181	GACCCAAGAAAGGCTATGTTGTCCCAAATGAACGTTACTGCTCCAACCTCTCCACCTGTCCAACAAAACATGATGAATTCTGCTTCTGCCATGAACCAAAGAATCTCTCAATCCGCCCCAGTCAAACAACCACCACCATTGGCTCCTCAATCTCCACAAGGTGGTGTTATGGGTGGTTCCAACTCTAACCAACAACAACAAATGAGACTACAACAATTGCAAATGGAAAAGGAAAGATTAAGATTGAAGCAACAAGAATTGTTGAGACAAGTCAGACCACAAGAATTAGCTTTGCGTTCACAGTTGCCAACTTTGGAACAAGATGGTGGTACCCAAAACCCAGTTTCCTCCCCAGGTATGTCTCAAGAA
IDR-182	ATCTCTTCCACCACCTTAGCCGCTCCATCTACCACTCAATCCATTGCTGTTCCAGCTTCTAACAGTACTCCTGTCCAAGAACAACCAACTGCTCAATCTGACACTTACGGTCAAGCTGCCTCCACTTTGGTTTCTGGTTCCTCAATTGAACAAATGGTTCAACAAATCATGGAAATGGGTGGTGGTTCTTGGGATAAGGAAACCGTCACCAGAGCTTTGAGAGCCGCTTACAACAACCCAGAA
IDR-183	TTAAACGAACCAGTTCAAGAAGCCGGTGGTCAAGGTGGCGGTGGTGGTGGTGGTTCTGGTGGTATCGCTGAAGCTGGTTCCGGTCACATGAACTACATCCAAGTCACTCCACAAGAAAAGGAAGCTATTGAAAGATTGAAGGCTTTGGGT
IDR-184	ATGCAATCCATGAAGGAAACTGCTTCTAACATTGCTGCTTCCGCTAAGTCTGGTATGGACAAGACCAAGGCCACTTTGGGTGAAAAGGCTGAAAAGATGACTACTCGTGACCCATTGCAAAAAGAAATGGCTACTCAAAAGAAGGAAGAAAGAATCAACGAAGCTGAAATGCAAAAGAGAGAAGCTAGAGAACACAATGCTGCTATGAAAGAAGCCTCCGGTGCTGGTACCGGTACTGGTTTGGGTTTAGGTTCAGCCACCCACTCTACCACTGGTCAAGTTGGTCACGGTACCGGTACTCACCAAATGTCTGCTTTGCCAGGTCATGGTACCGGTCAACCAACTGGTCATGTTGTCGATGGTACTGCCGCCACTGAACCAATCGGTACCAACACTGGA…
IDR-185	ATGCAATCCATGAAAGAAACCGCTTCTAACATTGCTGCTTCCGCTAGAGCTGGTATGGAAAAGACCAAGGCTACTGTTGAAGAAAAAGCTGAAAAGATGAAGACTAGAGACCCAGTTCAAAAGGAAATGGCTACCCAAAAGAAGGAAGACAGAATCAACCAAGCTGAATTGGAAAAGAGAGAAGCCAGAGAACACAATGCAGCTGCCAAGGAAGCTGCTGGTGCCGGTTTAGGTACTCCTGGTTACACTGCTAAGGGTTCCGGTGGTTTGGGTTCAGCCACTCACTCTACTACTGGTCGTATTGGTCATGGTACCGGTGCTCACCAAATGTCTGCTTTGCCAGGTCACGGTGCTGGTCAACCAACCGGTGATGTCGTCGAAGGTACTGAAACTGCTGCT…
IDR-186	ATGGAAGCTATGAAGGAAACCGCTGCCAATGTCGGTGCTTCTGCTATCTCTGGTAAGGAAAAGACCAAGGCTGTCGTCCAAGAAAAGATGGAACGTATGACTGCTCATGATCCAATGGAGAAAGAAATGGCTACCAAAAAGAAGGAAGAAAGAATCAACCAAGCTGAATTGAACAAGCAAGAAGCCAAGGAACAAAACGCTGCAGCCAGACAAGGTGCCTCCACTACAGGCACTGACAAGCCTCACTCTTACTCTACCACCGGTAGAACTGGTAACCCAACCGGTGCCCACCAAATGTCCGCTTTGCCAGGTCACGGTACCGGTGCTCCAACTGGTCAAGTTACTGAAGGTGTTGTTGAATCCAGACCAATTGGTACTGCTACTGGTACCAAGAGAACC…
IDR-187	ATGCAAGCTATGAAGGAAACTGCTTCTAACTTCGCTGCTTCCGCTAAGTCCGGTATGGAAAAGACCAAGGCTGTCGCTCAAGAAAAGATGGAAAGAATGACTGCTGATAATCCTACTGAAAAAGAAATGGCTACCGAAAAAAAGAAGGAAAGAATCAACGAAGCTGAAATGAACAAGCAAGAAGCCCGTGACAAGAACGCTGCTGCCAGACAAGGTTACTCCACCACCGGTACTGAAAAGACTCACTCTTACTCTACCACTGGTGCCACAGGTCATCCAACCGGTGCTCACCAAATGTCTGCTTTGCCAGGTCACGGTTCTGGTGAACCAGCTGGTCAAGTTGTTGAAGGTGTCGTCCAATCCCACCCAATTGGTACCGCAACTGGTACTCAAAGATCC…
IDR-188	ATGCAAGGTGCCAAGAAAGCCGGTGAAGCTATGAAGGAAACTGCTGCTAACGTTGGTGCTTCTGCTAAGTCTGGTATGGAAAAGACCAAGGCTACCGTCCAAGAAAAGACTGACAGAATGAGAGCTAGAGATCCATTGCAAAAGGAAATGGCTACTCAAAAGAAGGATGAAAGAATGAACCAAGCTGAATTGGACAAGCAAGCTGCTAGAGAACACAATGCTGCCGCTAAACAATCCGCCACTGCTGGTCACATGGGTCAAGGTCATTACACCACCGGTACAGGCACCGGTACTGCAACTTACTCCACCACTGGTGAATACGGTCAACCAATGGGTGTCCACCAAACTTCCGCTGTTCCAGGTCACGGTACTGGTCAACCAACTGGACATGTTACTGAA…
IDR-189	ATGCAATCCATGAAAGAAACTGCTTCTAACATTGCTGCTTCCGCTAAGTCCGGTATGGACAAGACCAAGGCTACTTTGGAAGAAAAAGCCGAAAAGATGAAGACTAGAGACCCAGTTCAAAAGCAAATGGCTACCCAAGTCAAGGAAGATAAGATCAACCAAGCTGAAATGCAAAAGAGAGAAACCAGAGAATACAACGCCGCTATGAAGGAAGCTGCCGGTGCTGGTACTGGTTTAGGTTTGGGTACTGCCACTCACTCTACCACCGGTCAAGTTGGTCATGGTACCGGCACACACCAAATGTCTGCTTTGCCAGGTCACGGTACCGGTCAATTGACTGACAGAGTTGTTGAAGGTACCGCAGTCACTGATCCAATCGGTCGTAATACTGGAACTGGT…
IDR-190	ATGCAATCCATGAAGGAAACTGCCTCCAACATTGCTGCTTCTGCCAAGTCCGGTATGGACAGAACCAAAGCCACTTTGGAAGAAAAGGCTGAAAAGATGACTACCAGAGATCCAGTTCAAAAGCAAATGGCTACTCAAAACAAGGAAGGTAAGATCAACCAAGCTGAAATGCAAAAGCGTGAAGCTAGAGAACACAATGCTGTTATGAAAGAAGCCTCTGGTGCTGGTACTGGTACTGGTTTAGGTTTGGGTTCAGCTACCCACTCTACCACCGGTCACGTCGGTCACGGTACCGGCACTCACCAAATGTCTGCTTTGCCAGGTCACGGTACCGGTCAACCAACTGGTCATGTCGTTGAAGGTACTGCTGTCACCAAGCCAATCGGTACCAACACCGGT…
IDR-191	ATGCAATCCATGAACGAAACCGCATCCAACATTGCTGCTTCTGCCAAGTCTGGTATGGACAAGACCAAGGCCACTTTGGAAGAAAAAGCTGAAAAGATGACTACCAGAGACCCAATCCAAAAAGAAATGGCTACTCAAAAGAAGGAAGGTAGAATCAACCAAGCTGAAATGCAAAAGAGAGAAGCTCGTGAACACAATGCCGCTATGAAGGAAGCCTCCGGTGCTGGTACCGGTACAGGTTTGGGTTTAGGTACTGCTACCCACTCTACTACTGGACATGTCGGTCACGGTACTGGTACTCACCAAATGTCTGCTTTGCCAGGTCATGGTACTGGTGAACCAACTGGTCACGTTGTTGATGGTACCGCTGTCACTGAACCAATTGGTACCAACACCGGT…
IDR-192	ATGCAATCCATGAAAGAAACTGCCTCCAACATTGCTGCTTCTGCCAAGTCTGGTATGGACAAGACCAAGGCCACTTTGGAAGAAAAGGCTGAAAAGATGACTACCAGAGACCCATTGCAAAAAGAAATGGCTACCCAAAAGAAGGAAGGTAGAATCAACGAAGCTGAAATGCAAAAGAGAGAAGCCCGTGAACACAATGCAGTTATGAAGGAAGCTTCCGGTGCTGGTACTGGTACTGGTTTAGGTATGGGTACTGCTACTCACTCTACTACTGGACATGTCGGTCACGGTACTGGTACCCACCAAATGTCTGCTTTGCCAGGTCATGGTACCGGTCAACCAGCTGGTCACGTTGTCGATGGTACTGCTGTCACTGAACCAATCGGTACCAACACCGGT…
IDR-193	ATGCAATCCGCTAAGGAAGCTGTCTCCAATATTGCTGCTTCTGCCAAGTCTGGTATGGACAAGACCAAGGCCACTTTGGAAGAAAAGGCTGAAAAGATGAAAACCAGAGATCCAGTTCAAAAAGAAATGGCTACTCAAAGAAAGGAAGGTAAGATCAACCAAGCTGAAATGCAAAAGAGAGAAACCCAAGAATACAACGCTGCTATGAAGCAAGCCGCTGGTGGTGGTACCGGTACTGGTGTTGGTTTAGGTACTGCAACTCACTCAACCACCGGTCAAGTTGGTCATGGTACAGGTACCCACCAAATGTCTGCTTTGCCAGGTCACGGTACTGGACATCCAACTGGTCACGTTGTTGAAGGTACTGCCGTCACTGAACCAATCGGTACCAACACTGGT…
IDR-194	ATGCAATCCATCAAGGAAACCGCCGCTAACATTGCTGCTTCTGCCAGATCCGGTTTGGAAAAGACCAAGGCTACTTTGGAAGAAAAAGTCGAAAGAGCTACCGCTCACGACCCAGTCCAAAAAGACATGGCCACTCAAAAGAAGGAAGAAAGAATCAGACAAGCAGAATTAGAAAAGCAAGAAGCTAGAGAAAACAATGCTGCTGCCCGTCAAGGTGGTGGTGACGGTGGATTCACTGCTAAGGGTTCTGGTGGTCACATGGCTTCCGGTACTCACACTTACTCCACCACCGGTCAAATGGGTCAACCAACTGGTGCTCAACAAATGTCTGCTTTGCCAGGTCATGGTACCGGTCAACCTACTGCCCAAGTTGATGATGGTAGAGTTCAAGCTTACCCA…
IDR-195	ATGCAATTGATCACTGCCAAAGCTCACCAAGCTAAGGCTATCAGAGTTAAGTTGAAGTTGATTAAACTATTAAAGAAGGAAAAAGAAAGAGAAAAGATGCAAGGTGCCAAGAACACCGGCCAATCAATCAAGGAAAAGGCTGCTAACGTCGGTGCTTCCGCTCAAGCCGGTTTGGAAAAGACCAAGGCCACCGTCCAAGAAAAGGCTGAAAAGATGTCCACCAGAGACCCTGTTCAAAAGCAAATGGCTACTCAAAAGAAAGAACACAAGACTAACCAAGCTGAAATGGAAAAGCAAGCCGCTTACAACCAAAACGCTGCTCACAAGGAAGCTGCCCGTGCAGAAGACATTGCTCCAGGTTACTACGGTACTGCTACCCACTCTACTACCGGTCAACAC…
IDR-196	ATGCAAGCTATCAAGGAAAAGGCTGCCAACGTTGCTGCTTCTGCTAAGTCTGGTATGGAAAAGACCAAAGCTACCATGCAAGAAAAGGTCGACAGAGCTGCCGCTAACAACCCAACCGAAAAAGAAATGGCTACTGAAAGAAAGGAACAAAAGGTTAACCAAGCTGAATTCGATAAGCGTGCCGCTCAAGAACACAATGCTGCAGCTAGAAACGCCACCAAGAACACTGGTCAACCACACACTTACTCAACCACTGGTGCTCCAGGTCATCCAACTGGTACTCACCAACAATCCGCTTTGCCAGGTCACGGTACCGGCCAACCTACAGGTCAAGTCACTGAAGGTGTTGTTGAATCCCATCACATTGGTACTGCTACTGGTACCGGTAGAACCAACGCT…
IDR-197	ATGCAAGCTGGTAAGAACGTCGCTGAATCCATGAAGGAATCTGCCGCTAACGTTGCTGCCTCCGCTAAGTCTGGTATGGAAAAGACCAAGGCTACCGTCCAAGAAAAGGTTGAAAAGATGAAAGCCCATGACCCAACTGAAAAAGAAATGGCTGCAGAGAAGAAGGAACAAAGAAAGGCTGAAGCCGAATTGAACAAGCGTGAAGCTAGAGAACACAATGCTGCTGTCAGAGAAGCTTCTAAGACTGGTGTTAACGCCGGTGGTCACACTGGTTACTCCACCACTGGTGTCGAAACTGCTACTTACTCTACTACTGGTATTGAAGGTCAACCTACCGGTGCTCACCAAATGTCTGCTTTGCCAGGTTACGGTACAGGCCAACCAGCTGGTCAAGTTACC…
IDR-198	ATGCAAGCTATCAAGGAAAAAGCAGCCAACGTTGCTGCTTCTGCTAAGTCTGGTATGGAAAAGACCAAGGCTACCATGCAAGAAAAGGTTGACAGAGCTACTGCTAACAACCCAACTGAAAAAGAAATGGCTACCGAAAGAAAGGAACAAAGAGTTAACCAAGCTGAATTCGACAAGCGTGCTGCTCAAGAACACAATGCTGCCGCCAGAAACGCTACTAAGAACACCGGTCAACCACACACTTACCCAACCACCGGTGCTCCAGGTCATCCTACAGGCACCCACCAACAATCCGCTTTGCCAGGTCACGGTACTGGTCAAGTCACTGAAGGTGTTGTCGAATCCCATCCAATCGGTACCGCTGCTGGTACTGGTAGAACTTCAGCCGCTCACAACACT…
IDR-199	ATGCAAACTGCCAAGAACGCTGCTGCTTCTGTCAAAGAAACCGCTGCCAATGTTGCCGCTTCCGCTAAGTCTGGTATGGAAAAAACCAAGGCTACTTTGCAAGAAAAGGGTGAAAGAATGACTGCTCACGACCCAACTCAAAAGGAAATGGCTACTGAAAAGAAGGAAGCTAGAAAGGACCAAGCTGAATACGAAAAGCAAGTTGAAAGAGATCAAAACGCCGTCCAAAGACAAGCTGTCGAAGCCACCGGCACTCACTCTTATTCAACCACCGGTGCTACCGGTCATCCAATGGGTTCTCACCAAATGTCTGCTTTGCCAGGTCACGGTACCGGTCAACCAGCTGGTGATGTTGTTGAAGGTGTTGTCGGTTCCCACCCTATCGGTAGAAACACTGGT…
IDR-200	ATGCAAGCTATCAAGGAAAAGGCTGCCAACGTTGCTGCTTCCGCTAAGTCTGGTATGGAAAAGACCAAAGCTACCATGCAAGAAAAGGTTGACCGTGCCACTGCTAACAACCCAACCGAAAAAGAAATGGCTACTGAAAGAAAGGAACAAAGAGTTAACCAAGCTGAATTCGATAAGAGAGCTGCTCAAGAACACAACGCAGCTGCTAGAAACGCCACCAAGAACACTGGCCAACCACACACTTACTCTACCACCGGTGCTCCAGGTCACCCAACTGGTACTCACCAACAATCTGCTTTGCCAGGTCAACCTACTGGTCAAGTCACTGAAGGTGTTGTCGAATCCCATCCAATTGGTACAGCCGCTGGTACCGGTAGAACTAATGCTGCTCACAACACC…
